# Supplementary material for: Genetic Dissection of End-Use Quality Traits in Adapted Soft White Winter Wheat
Source: PubMed Central journal article supplement (PMC5861628; doi:10.3389/fpls.2018.00271), 2018-03-09
Supplement: Image1.pdf [file Image1.pdf]

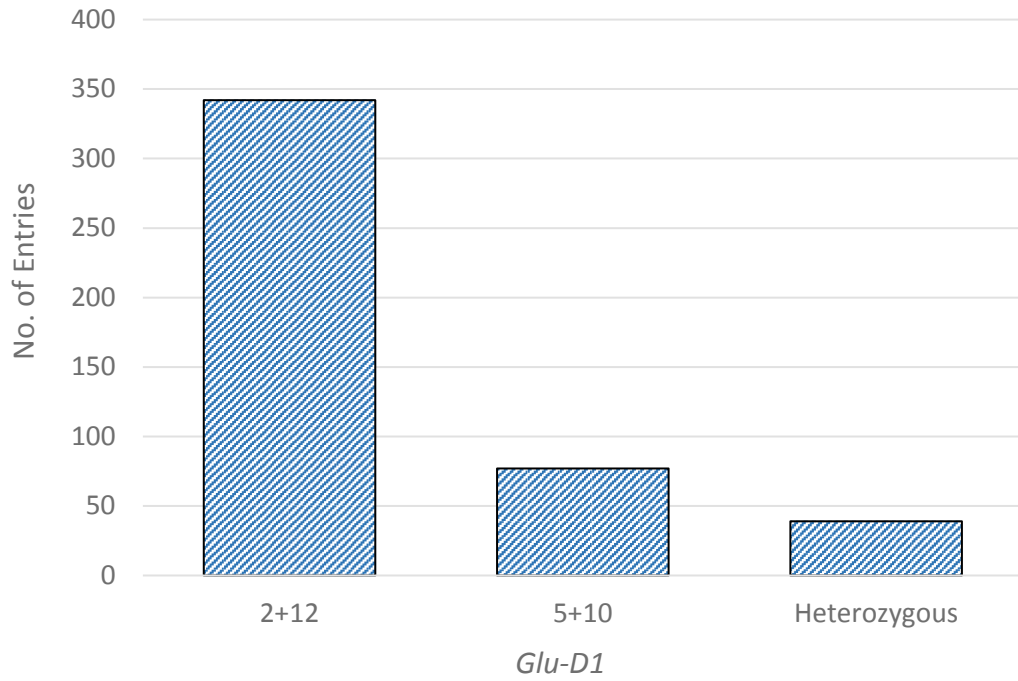

Supplementary Figure 1. Proportion of the elite genotypes carrying a specific allele at each *Glu-D1* loci in the Pacific Northwest soft white winter wheat diversity panel.
