# Supplementary material for: Genetic Dissection of End-Use Quality Traits in Adapted Soft White Winter Wheat
Source: Front Plant Sci. 2018 Mar 9;9:271. doi: 10.3389/fpls.2018.00271 (PMC5861628; doi:10.3389/fpls.2018.00271)
Supplement: Supplementary file 6 [file Table6.xlsx]

## Sheet: Sheet1
Association mapping for end-use quality traits in Pacific Northwest adapted soft white wheat
Kendra L. Jernigan1, Jayfred V. Godoy1, Meng Huang1, Yao Zhou1, Craig F. Morris2,3, Kimberly A. Garland-Campbell3, Zhiwu Zhang1, Arron H. Carter1
1Department of Crop and Soil Sciences, Washington State University, Pullman, WA 99164-6420, USA
2Western Wheat Quality Laboratory, Agricultural Research Service, United States Department of Agriculture, Pullman, WA 99164-6394, USA
3Wheat Health, Genetics, and Quality Research Unit, Agricultural Research Service, United States Department of Agriculture, Pullman, WA 99164-6394, USA
Supplementary Table 6. Genotype and phenotype data of MTAs for end-use quality traits that affect cookie diameter and milling score.
Breeding Program	Head type	Glu-D1	Rht1 and Rht2	Entry ID		Cookie Diameter (CODI)																							BLUP							Milling Score (MSCOR)									BLUP
						SKHRD	BKFYELD	BKFYELD	BKFYELD	FYELD	FYELD	FYELD	FYELD	FYELD	FASH	FSRC	FSRL	FSRL	FSRL	FSRL	FSRL	FSRW	FSRW	FSRW	FSRW	FSRW	CODI	CODI	Cookie diameter (CODI)	Break Flour Yield (BKYLD)	Total flour yield (FYELD)	Flour ash (MSCOR)	Carbonate SRC (FSRC)	Lactic Acid SRC (FSRL)	Water SRC (FSRW)	BKFYELD	BKFYELD	BKFYELD	FYELD	FYELD	FYELD	FYELD	FYELD	MSCOR	Milling score (MSCOR)
					SNP IDa	IWB80508	IWB66086	IWB45033	IWB54370	IWB9175	IWB27057	IWB6967	IWB60199	IWB76667	IWB35842	IWB66086	IWB10813	IWB56695	IWB3277	IWB12222	IWB57207	IWB7122	IWB9256	IWB27057	IWB65378	IWB10273	IWB7122	IWB66086								IWB66086	IWB45033	IWB54370	IWB9175	IWB27057	IWB6967	IWB60199	IWB76667	IWB78525
					SNP Name	wsnp_Ku_c4389_7970859	TA006348-0950	Kukri_c40388_844	RAC875_c16839_188	BS00064032_51	Excalibur_c49496_705	BS00022211_51	RAC875_c6865_349	wsnp_Ex_c14812_22928900	IACX219	TA006348-0950	BS00075532_51	RAC875_c32077_284	BobWhite_c4303_524	BS00104279_51	RAC875_c36670_72	BS00022504_51	BS00064349_51	Excalibur_c49496_705	TA001322-1176	BS00068257_51	BS00022504_51	TA006348-0950								TA006348-0950	Kukri_c40388_844	RAC875_c16839_188	BS00064032_51	Excalibur_c49496_705	BS00022211_51	RAC875_c6865_349	wsnp_Ex_c14812_22928900	wsnp_Ex_c5915_10379277
					Chromosome	5A	4A	5B	7B	1B	1B	2D	4B	5A	1A	4A	1A	1B	1D	4B	7B	1B	1B	1B	2B	5A	2A	1B								4A	5B	7B	1B	1B	2D	4B	5A	5B
					Position	39.62	110.13	40.57	55.64	79.77	122.52	42.37	68.45	43.27	73.48	110.13	111.56	78.45	3.4	104.79	21.86	8.36	95.49	122.52	96.14	26.5	167.87	43.86								110.13	40.57	55.64	79.77	122.52	42.37	68.45	43.27	38.5
					Favorable Alleleb	C	C	A	G	A	C	A	A	C	T	C	G	C	C	T	C	G	C	C	G	T	G	C								C	A	G	A	C	A	A	C	A
					Populationwide	0.925373	0.852878	0.307036	0.539446	0.626866	0.748401	0.537313	0.420043	0.334755	0.925373	0.852878	0.925373	0.637527	0.358209	0.663113	0.906183	0.940299	0.334755	0.748401	0.469083	0.247335	0.940299	0.852878								0.852878	0.307036	0.539446	0.626866	0.748401	0.537313	0.420043	0.334755	0.624733
					Club	0.924855	0.936416	0.410405	0.895954	0.815029	0.947977	0.635838	0.843931	0.612717	0.982659	0.936416	0.971098	0.855491	0.83237	0.913295	0.976879	1	0.526012	0.947977	0.393064	0.537572	1	0.936416								0.936416	0.410405	0.895954	0.815029	0.947977	0.635838	0.843931	0.612717	0.635838
					Common	0.925676	0.804054	0.246622	0.331081	0.516892	0.631757	0.47973	0.172297	0.172297	0.891892	0.804054	0.898649	0.510135	0.0810811	0.516892	0.864865	0.905405	0.222973	0.631757	0.513514	0.0777027	0.905405	0.804054								0.804054	0.246622	0.331081	0.516892	0.631757	0.47973	0.172297	0.172297	0.618243
					Entry Name/allelesc	C/T	C/T	G/A	G/A	A/G	C/T	A/C	G/A	T/C	T/G	C/T	G/A	C/T	T/C	T/C	C/A	G/A	T/C	C/T	A/G	C/T	G/A	C/T								C/T	G/A	G/A	A/G	C/T	A/C	G/A	T/C	A/G
WSU	lax	2+12	Rht1	QAM001	WA8152	CC	CC	GG	AA	GG	TT	AA	GG	TT	GG	CC	GG	TT	TT	CC	CC	GG	TT	TT	GG	CC	GG	CC	-0.03589	0.02023	0.2168	-0.00689	0.5725	11.8371	0.9327	CC	GG	AA	GG	TT	AA	GG	TT	AA	0.8015
WSU	lax	2+12	Rht1	QAM002	WA8154	CC	CC	GG	AA	GG	CC	AA	GG	TT	GG	CC	GG	TT	TT	TT	CC	GG	CC	CC	AA	CC	GG	CC	-0.05578	-2.1311	-0.5849	0.000814	-0.9117	2.5494	-0.156	CC	GG	AA	GG	CC	AA	GG	TT	AA	-0.7545
WSU	lax	2+12	Rht1	QAM003	WA8153	CC	CC	GG	GG	GG	NN	CC	GG	TT	TT	CC	GG	TT	TT	TT	CC	GG	CC	NN	GG	CC	GG	CC	-0.03297	-4.1373	-2.5868	0.003167	0.3251	7.1309	0.2597	CC	GG	GG	GG	NN	CC	GG	TT	AA	-2.3131
WSU	lax	2+12	Rht1	QAM004	5J050304-1	TT	CC	GG	AA	GG	CC	AA	GG	TT	TT	CC	GG	TT	TT	TT	CC	GG	CC	CC	GG	CC	GG	CC	-0.1784	-2.077	0.2681	0.004067	-1.5126	2.3341	-0.3275	CC	GG	AA	GG	CC	AA	GG	TT	AA	-0.1311
WSU	lax	2+12	Rht1	QAM005	5J050409-2	CC	CC	AA	GG	GG	CC	CC	AA	TT	TT	CC	GG	TT	TT	TT	CC	GG	CC	CC	GG	CC	GG	CC	-0.1361	0.5878	0.2705	0.00842	3.2121	6.6783	-0.3275	CC	AA	GG	GG	CC	CC	AA	TT	AA	0.3274
WSU	lax	2+12	Rht1	QAM006	5J061865-1	CC	CC	GG	AA	AA	CC	AA	GG	TT	TT	CC	GG	CC	TT	TT	CC	GG	TT	CC	AA	CC	GG	CC	0.04938	0.4496	-0.1252	0.01387	-0.2402	1.7005	-0.9172	CC	GG	AA	AA	CC	AA	GG	TT	AA	-1.1639
WSU	lax	2+12	Rht1	QAM007	5J061865-10	TT	CC	GG	AA	AA	CC	AA	GG	CC	TT	CC	GG	CC	TT	TT	CC	GG	TT	CC	GG	TT	GG	CC	0.04971	1.3376	1.0199	-0.00414	-2.0807	6.3163	-1.6202	CC	GG	AA	AA	CC	AA	GG	CC	AA	1.1603
WSU	lax	2+12	Rht1	QAM008	5J061865-11	TT	CC	GG	AA	GG	CC	AA	GG	CC	TT	CC	GG	TT	TT	TT	CC	GG	CC	CC	AA	TT	GG	CC	0.1278	1.4938	0.8951	0.01179	-0.9798	12.2897	-2.2492	CC	GG	AA	GG	CC	AA	GG	CC	AA	0.165
WSU	lax	2+12	Rht1	QAM009	5J061865-4	TT	CC	GG	AA	GG	CC	AA	GG	CC	TT	CC	GG	TT	TT	TT	CC	GG	CC	CC	AA	TT	GG	CC	0.1774	4.5352	1.8182	0.008548	-1.5526	10.9321	-3.0262	CC	GG	AA	GG	CC	AA	GG	CC	AA	1.5336
WSU	lax	2+12	Rht1	QAM010	5J061865-5	CC	CC	GG	AA	AA	CC	CC	GG	TT	TT	CC	GG	CC	TT	TT	CC	GG	TT	CC	AA	CC	GG	CC	0.02088	-0.7733	-0.1697	0.008431	0.09257	-2.7342	-0.2513	CC	GG	AA	AA	CC	CC	GG	TT	AA	-0.8565
WSU	lax	2+12	Rht1	QAM011	5J061865-6	TT	CC	GG	AA	GG	CC	AA	GG	CC	TT	CC	GG	TT	TT	TT	CC	GG	TT	CC	GG	TT	GG	CC	0.1634	0.7017	0.5229	0.007187	-1.0168	3.3296	-3.6551	CC	GG	AA	GG	CC	AA	GG	CC	AA	-0.4291
WSU	lax	2+12	Rht1	QAM012	5J061865-7	TT	CC	GG	AA	GG	CC	AA	GG	CC	TT	CC	GG	TT	TT	TT	CC	GG	CC	CC	GG	TT	GG	CC	0.05413	2.2625	0.9157	0.002584	1.3868	11.0226	-1.8052	CC	GG	AA	GG	CC	AA	GG	CC	AA	0.5251
WSU	lax	2+12	Rht1	QAM013	5J061865-8	CC	CC	GG	AA	NN	CC	AA	GG	TT	TT	CC	GG	NN	TT	TT	CC	GG	NN	CC	GG	CC	GG	CC	-0.08123	-1.0236	-1.0975	-0.00788	-0.9059	-2.5532	-0.3253	CC	GG	AA	NN	CC	AA	GG	TT	AA	-1.142
WSU	lax	2+12	Rht1	QAM014	5J061865-9	TT	CC	GG	AA	GG	CC	AA	GG	CC	TT	CC	GG	TT	TT	TT	CC	GG	CC	CC	GG	TT	GG	CC	0.1444	0.1847	-0.3883	0.021	-2.3111	4.7777	-1.5462	CC	GG	AA	GG	CC	AA	GG	CC	AA	-2.1034
WSU	lax	2+12	.	QAM015	5J061870-11	CC	CC	GG	AA	AA	CC	CC	GG	TT	TT	CC	GG	CC	TT	TT	CC	GG	TT	CC	AA	CC	GG	CC	-0.02899	-0.8607	-0.9694	-0.00426	0.9431	-1.0146	0.5627	CC	GG	AA	AA	CC	CC	GG	TT	AA	-0.8785
WSU	lax	2+12	.	QAM016	5J061870-12	CC	CC	GG	AA	GG	TT	AA	GG	TT	TT	CC	GG	TT	TT	CC	CC	GG	TT	TT	AA	CC	GG	CC	-0.1572	-1.2688	-0.6953	-0.01694	2.4593	2.6961	1.9316	CC	GG	AA	GG	TT	AA	GG	TT	AA	0.4389
WSU	lax	2+12	Rht1	QAM017	5J061870-7	CC	CC	GG	AA	AA	CC	CC	GG	TT	TT	CC	GG	CC	TT	CC	CC	GG	TT	CC	AA	CC	GG	CC	-0.08272	-1.1332	-0.5959	-0.00536	0.6185	-0.1096	2.139	CC	GG	AA	AA	CC	CC	GG	TT	AA	-0.669
WSU	lax	5+10	Rht1	QAM018	5J062060-8	CC	CC	AA	AA	AA	TT	AA	GG	TT	TT	CC	GG	CC	TT	TT	CC	GG	CC	TT	AA	CC	GG	CC	0.104	1.2681	-0.3325	0.005653	0.01861	7.9454	-0.1403	CC	AA	AA	AA	TT	AA	GG	TT	AA	-0.8792
WSU	lax	2+12	Rht1	QAM019	5J062064-6	CC	CC	GG	AA	AA	TT	CC	GG	TT	TT	CC	GG	CC	TT	TT	CC	GG	TT	TT	AA	CC	GG	CC	-0.123	-1.4271	-0.1031	0.005809	3.876	-5.0874	1.8453	CC	GG	AA	AA	TT	CC	GG	TT	AA	-0.1689
WSU	lax	2+12	Rht1	QAM020	5J062064-7	CC	CC	GG	AA	AA	CC	CC	GG	TT	TT	CC	GG	CC	TT	CC	CC	GG	TT	CC	AA	CC	GG	CC	0.003221	-0.9875	0.1124	-0.01389	-2.3154	1.5195	-0.1513	CC	GG	AA	AA	CC	CC	GG	TT	AA	0.3489
WSU	lax	2+12	Rht1	QAM021	5J062100-1	CC	CC	GG	AA	AA	CC	CC	GG	TT	TT	CC	GG	CC	TT	CC	CC	GG	TT	CC	AA	CC	GG	CC	-0.04814	-1.4506	0.008806	-0.00425	-0.2772	1.067	0.6708	CC	GG	AA	AA	CC	CC	GG	TT	AA	0.2878
WSU	lax	2+12	Rht1	QAM022	5J062100-2	CC	CC	GG	AA	AA	CC	CC	GG	TT	TT	CC	GG	CC	TT	CC	CC	GG	TT	CC	AA	CC	GG	CC	-0.2381	-2.2017	-0.6331	-0.00203	0.8322	-2.6437	0.7296	CC	GG	AA	AA	CC	CC	GG	TT	AA	-0.922
WSU	lax	2+12	Rht1	QAM023	5J062100-3	CC	TC	GG	AA	AA	CC	CC	GG	TT	TT	TC	GG	CC	TT	CC	CC	GG	TT	CC	AA	CC	GG	TC	-0.09044	-4.1814	-1.621	-0.00734	1.1466	-0.6526	2.0426	TC	GG	AA	AA	CC	CC	GG	TT	AA	-1.4519
WSU	lax	H	Rht1	QAM024	5J062100-4	CC	CC	GG	AA	AA	CC	CC	GG	TT	NN	CC	GG	CC	TT	CC	CC	GG	TT	CC	AA	CC	GG	CC	-0.1002	-1.3282	-0.05886	-0.00426	0.1665	2.6961	0.1557	CC	GG	AA	AA	CC	CC	GG	TT	AA	0.08761
WSU	lax	2+12	Rht1	QAM025	5J062100-6	CC	TC	GG	AA	AA	CC	CC	NN	TT	NN	TC	GG	CC	TT	CC	CC	GG	TT	CC	NN	CC	GG	TC	-0.232	-4.3842	-1.9945	0.000324	0.5598	-4.9969	1.9628	TC	GG	AA	AA	CC	CC	NN	TT	AA	-2.3523
WSU	lax	2+12	Rht1	QAM026	5J062111-2	CC	CC	GG	AA	AA	CC	NN	AA	TT	TT	CC	GG	CC	TT	CC	CC	GG	TT	CC	AA	CC	GG	CC	-0.05558	-1.0166	-0.116	-0.00536	-2.0807	0.9765	1.9628	CC	GG	AA	AA	CC	NN	AA	TT	AA	-0.00346
WSU	lax	2+12	Rht1	QAM027	5J062167-2	CC	CC	GG	AA	GG	TT	CC	GG	TT	TT	CC	AA	TT	TT	TT	CC	GG	TT	TT	GG	CC	GG	CC	0.04218	-2.3539	-0.8284	-0.00646	0.9061	5.5018	1.2581	CC	GG	AA	GG	TT	CC	GG	TT	AA	-0.5
WSU	lax	2+12	Rht1	QAM028	5J062174-3	CC	CC	GG	GG	GG	TT	CC	GG	TT	TT	CC	GG	TT	TT	NN	CC	GG	CC	TT	GG	CC	GG	CC	-0.0013	-3.8082	-0.9875	-0.00536	1.0292	11.9276	-0.8561	CC	GG	GG	GG	TT	CC	GG	TT	GG	-0.5515
WSU	lax	2+12	Rht1	QAM029	5J062199-1	CC	CC	GG	AA	AA	CC	AA	GG	TT	TT	CC	GG	CC	TT	TT	CC	AA	TT	CC	GG	CC	AA	CC	-0.02011	-0.5252	0.04601	0.006822	-0.3512	-4.0013	-0.6799	CC	GG	AA	AA	CC	AA	GG	TT	AA	-0.303
WSU	lax	2+12	Rht1	QAM030	5J062215-6	CC	CC	GG	AA	AA	CC	AA	GG	TT	TT	CC	GG	CC	TT	TT	CC	GG	TT	CC	GG	CC	GG	CC	-0.0194	-2.649	-0.3217	0.000324	-2.9609	-13.9569	0.1423	CC	GG	AA	AA	CC	AA	GG	TT	AA	-1.2953
WSU	lax	2+12	Rht1	QAM031	5J062217-3	CC	CC	NN	AA	AA	CC	AA	GG	TT	TT	CC	NN	CC	TT	TT	CC	GG	CC	CC	AA	CC	GG	CC	-0.03611	-1.3563	-0.4668	-0.00788	-0.721	4.4157	0.8587	CC	NN	AA	AA	CC	AA	GG	TT	AA	0.02174
WSU	lax	2+12	Rht1	QAM032	5J062227-1	CC	TC	GG	AA	GG	NN	NN	GG	TT	TT	TC	GG	TT	TT	TC	CC	GG	TT	NN	NN	CC	GG	TC	0.003221	-2.9853	-1.7575	0.003167	1.0879	6.2258	1.9041	TC	GG	AA	GG	NN	NN	GG	TT	AA	-2
WSU	lax	2+12	Rht1	QAM033	5J062248-1	CC	CC	GG	GG	AA	TT	CC	GG	TT	TT	CC	GG	CC	TT	CC	CC	GG	TT	TT	GG	CC	GG	CC	-0.04324	-1.7935	-0.284	-0.00607	1.4608	10.8416	1.2287	CC	GG	GG	AA	TT	CC	GG	TT	AA	0.1096
WSU	lax	2+12	Rht1	QAM034	5J062268-1	CC	CC	AA	GG	AA	CC	CC	AA	CC	TT	CC	GG	CC	TT	TT	CC	GG	CC	CC	GG	CC	GG	CC	0.07463	0.425	0.173	0.004924	-0.3204	1.791	0.1927	CC	AA	GG	AA	CC	CC	AA	CC	AA	-0.2229
WSU	lax	2+12	Rht1	QAM035	SSD060443	CC	CC	AA	GG	AA	TT	AA	AA	TT	TT	CC	GG	CC	TT	TT	CC	GG	CC	TT	AA	CC	GG	CC	0.03238	1.7379	-0.1808	0.01332	3.2136	-0.2001	0.7883	CC	AA	GG	AA	TT	AA	AA	TT	AA	-0.8526
WSU	lax	2+12	Rht1	QAM036	WA8064-55	CC	CC	AA	GG	AA	CC	CC	AA	CC	NN	CC	GG	CC	TT	TT	CC	GG	CC	CC	GG	CC	GG	CC	0.1855	1.7544	0.139	0.01125	-0.3142	-1.3766	0.4359	CC	AA	GG	AA	CC	CC	AA	CC	AA	-1.0626
WSU	lax	2+12	Rht1	QAM037	WA8151	CC	CC	AA	AA	AA	TT	CC	GG	TT	NN	CC	GG	CC	TT	TT	CC	GG	CC	TT	AA	CC	GG	CC	0.05496	-0.1714	-1.0045	-0.00223	1.1395	3.6331	1.2863	CC	AA	AA	AA	TT	CC	GG	TT	AA	-1.1066
WSU	club	H	wildtype	QAM038	5J030235-4	CC	CC	AA	GG	AA	CC	AA	AA	CC	TT	CC	GG	CC	CC	TT	CC	GG	TT	CC	AA	TT	GG	CC	0.1946	1.0155	1.3845	-0.0045	-3.2125	-10.8797	-0.09261	CC	AA	GG	AA	CC	AA	AA	CC	AA	2.0095
WSU	club	5+10	.	QAM039	5J030235-7	CC	CC	GG	GG	AA	TT	CC	GG	CC	TT	CC	AA	CC	CC	TT	CC	GG	CC	TT	AA	TT	GG	CC	0.229	0.6037	0.2878	0.02027	-4.5464	-17.2151	-1.2084	CC	GG	GG	AA	TT	CC	GG	CC	GG	-1.088
WSU	club	H	wildtype	QAM040	5J030465-1	CC	CC	AA	GG	AA	CC	AA	AA	CC	TT	CC	GG	CC	CC	TT	CC	GG	TT	CC	AA	TT	GG	CC	0.2328	0.6762	0.7575	-0.01386	-3.6055	-9.8841	0.847	CC	AA	GG	AA	CC	AA	AA	CC	AA	1.9284
WSU	lax	2+12	Rht1	QAM041	5J030662-13	CC	CC	GG	AA	NN	CC	AA	GG	TT	TT	CC	GG	CC	TT	TC	CC	GG	TT	CC	GG	CC	GG	CC	-0.0482	-3.0817	-0.1876	-0.00297	1.4045	1.248	0.9645	CC	GG	AA	NN	CC	AA	GG	TT	AA	-0.01236
WSU	lax	H	Rht1	QAM042	5J040094-1	CC	CC	GG	GG	GG	NN	CC	AA	NN	TT	CC	AA	TT	TT	TT	CC	GG	TT	NN	GG	CC	GG	CC	0.06234	-0.414	-0.7112	-0.00616	1.8733	15.7289	-0.03389	CC	GG	GG	GG	NN	CC	AA	NN	AA	-0.4493
WSU	lax	2+12	Rht1	QAM043	5J040150-1	CC	CC	GG	AA	GG	TT	CC	AA	TT	TT	CC	GG	TT	TT	CC	CC	GG	TT	TT	AA	CC	GG	CC	-0.2123	-3.2469	-2.2729	-0.00389	5.2887	10.6606	2.1536	CC	GG	AA	GG	TT	CC	AA	TT	AA	-2.5766
WSU	lax	2+12	Rht1	QAM044	5J050278-4	CC	CC	GG	AA	GG	CC	AA	GG	NN	TT	CC	GG	NN	TT	TT	CC	GG	TT	CC	AA	TC	GG	CC	0.05639	0.1167	0.386	-0.01056	-5.3799	0.343	-0.9148	CC	GG	AA	GG	CC	AA	GG	NN	AA	1.2857
WSU	lax	2+12	Rht1	QAM045	5J050278-6	TT	CC	GG	AA	GG	CC	AA	GG	TT	NN	CC	GG	TT	TT	TT	CC	GG	CC	CC	GG	TC	GG	CC	-0.03394	0.7305	0.1207	0.009901	-0.8035	7.4929	-0.6799	CC	GG	AA	GG	CC	AA	GG	TT	AA	-0.4482
WSU	lax	2+12	Rht1	QAM046	5J050348-2	CC	CC	GG	GG	GG	TT	NN	GG	TT	TT	CC	GG	TT	TT	TT	CC	GG	CC	TT	GG	CC	GG	CC	-0.1602	-3.4328	-1.9763	-0.00028	2.5357	5.4113	-0.09261	CC	GG	GG	GG	TT	NN	GG	TT	AA	-2.4011
WSU	lax	2+12	Rht1	QAM047	5J050348-3	CC	CC	GG	GG	GG	TT	AA	GG	TT	TT	CC	GG	TT	TT	TT	CC	GG	CC	TT	GG	CC	GG	CC	0.004482	-1.0997	-1.6202	0.003542	-0.5732	13.5567	-1.1497	CC	GG	GG	GG	TT	AA	GG	TT	AA	-2.2707
WSU	lax	2+12	Rht1	QAM048	5J050390-1	CC	CC	GG	AA	AA	TT	AA	GG	TT	TT	CC	GG	CC	TT	TC	CC	GG	TT	TT	AA	CC	GG	CC	-0.1141	-2.4074	-0.8836	-0.01302	0.5085	8.5789	2.0803	CC	GG	AA	AA	TT	AA	GG	TT	AA	-0.09099
WSU	lax	2+12	Rht1	QAM049	5J050390-4	CC	CC	GG	AA	AA	CC	AA	GG	TT	TT	CC	GG	CC	TT	TC	CC	GG	TT	CC	AA	CC	GG	CC	-0.08672	-0.05591	0.9711	-0.00106	1.4267	1.1575	1.1917	CC	GG	AA	AA	CC	AA	GG	TT	AA	1.1501
WSU	lax	2+12	Rht1	QAM050	6J020187-2	CC	CC	GG	GG	AA	TT	AA	GG	TT	TT	CC	GG	CC	TT	CC	CC	GG	TT	TT	GG	CC	GG	CC	-0.05137	-4.1647	-0.9267	0.01397	-0.8485	-5.7209	-0.2101	CC	GG	GG	AA	TT	AA	GG	TT	GG	-2.2449
WSU	lax	5+10	Rht1	QAM051	6J020210-1	CC	CC	GG	AA	GG	NN	AA	GG	TT	TT	CC	GG	TT	TT	TT	AA	GG	TT	NN	GG	CC	GG	CC	-0.1226	-1.8327	-0.1955	-0.00235	-1.4352	31.0243	-0.03389	CC	GG	AA	GG	NN	AA	GG	TT	AA	-0.09322
WSU	lax	2+12	wildtype	QAM052	6J020219-1	CC	TT	GG	GG	AA	CC	AA	GG	TT	TT	TT	GG	TT	TT	CC	CC	AA	TT	CC	GG	CC	AA	TT	-0.4536	-8.795	-0.3166	0.0117	9.1855	16.6339	5.3689	TT	GG	GG	AA	CC	AA	GG	TT	GG	-1.2953
WSU	lax	2+12	wildtype	QAM053	6J020219-3	CC	TT	GG	GG	AA	CC	AA	GG	TT	TT	TT	GG	TT	TT	CC	CC	AA	TT	CC	NN	CC	AA	TT	-0.5305	-8.0261	-0.1482	0.00601	9.4789	35.278	5.0166	TT	GG	GG	AA	CC	AA	GG	TT	AA	-0.7081
WSU	lax	2+12	wildtype	QAM054	6J020288-1	CC	TT	GG	GG	AA	CC	AA	GG	TT	TT	TT	GG	TT	TT	CC	CC	AA	TT	CC	AA	CC	AA	TT	-0.5667	-9.7038	-0.3586	0.01738	14.936	7.4929	7.6592	TT	GG	GG	AA	CC	AA	GG	TT	GG	-1.7259
USDA-ARS	lax	2+12	Rht2	QAM055	ARS010780-1L	CC	CC	GG	GG	AA	CC	CC	AA	CC	TT	CC	GG	CC	CC	TT	CC	GG	CC	CC	AA	TT	GG	CC	-0.07741	0.9593	0.9146	-0.00682	-1.3766	-19.4777	-0.5037	CC	GG	GG	AA	CC	CC	AA	CC	AA	1.6536
USDA-ARS	club	2+12	Rht2	QAM056	ARS010780-3C	CC	CC	GG	AA	AA	CC	AA	AA	CC	TT	CC	GG	CC	CC	TT	CC	GG	CC	CC	AA	TT	GG	CC	0.03658	0.8719	1.1888	-0.00863	-2.3154	-24.727	0.2597	CC	GG	AA	AA	CC	AA	AA	CC	AA	2.1366
WSU	lax	2+12	Rht1	QAM057	F/E-39	CC	CC	AA	GG	AA	CC	CC	AA	CC	TT	CC	GG	CC	TT	TT	CC	GG	CC	CC	GG	CC	GG	CC	0.05607	1.6649	0.03016	0.03977	1.115	1.61	-0.1513	CC	AA	GG	AA	CC	CC	AA	CC	AA	-2.8705
WSU	lax	2+12	Rht1	QAM058	F/E-4	CC	CC	GG	AA	AA	TT	CC	AA	CC	TT	CC	AA	CC	TT	TT	AA	GG	CC	TT	GG	CC	GG	CC	-0.0066	1.2404	-0.07243	0.03458	-0.4213	-3.8203	-0.6799	CC	GG	AA	AA	TT	CC	AA	CC	AA	-2.5011
WSU	club	2+12	Rht2	QAM059	J010038-4	CC	CC	GG	GG	GG	CC	AA	AA	CC	TT	CC	GG	TT	CC	TT	CC	GG	TT	CC	AA	TT	GG	CC	0.02344	-0.7243	1.1619	0.02212	-0.7898	-16.491	0.201	CC	GG	GG	GG	CC	AA	AA	CC	AA	-0.1658
WSU	club	2+12	Rht2	QAM060	J010039-1	CC	CC	GG	GG	AA	CC	AA	AA	CC	TT	CC	GG	TT	CC	TT	CC	GG	CC	CC	AA	TT	GG	CC	0.1695	0.07914	1.4165	-0.00358	-3.4069	-20.2923	-0.3275	CC	GG	GG	AA	CC	AA	AA	CC	NN	1.9831
WSU	club	2+12	Rht2	QAM061	J010049-1	CC	CC	AA	GG	AA	CC	AA	AA	NN	TT	CC	GG	CC	CC	TT	CC	GG	CC	CC	AA	TC	GG	CC	0.004282	0.1383	0.7368	0.002285	-2.4471	-21.3783	-1.3441	CC	AA	GG	AA	CC	AA	AA	NN	AA	0.7435
WSU	club	2+12	Rht2	QAM062	J010049-2	CC	CC	AA	GG	AA	CC	AA	AA	CC	TT	CC	GG	CC	CC	TT	CC	GG	TT	CC	AA	TT	GG	CC	0.02472	0.4726	1.1175	0.01268	-0.7311	-19.0252	-0.3862	CC	AA	GG	AA	CC	AA	AA	CC	AA	0.4123
WSU	lax	2+12	Rht1	QAM063	J01C0009-11	CC	CC	GG	AA	GG	CC	AA	GG	TT	TT	CC	GG	TT	TT	CC	CC	GG	TT	CC	AA	CC	GG	CC	-0.01518	-1.0721	-0.5336	0.00708	-1.0245	8.3979	0.1423	CC	GG	AA	GG	CC	AA	GG	TT	AA	-1.174
WSU	club	2+12	Rht1	QAM064	J950048-001	CC	CC	AA	NN	GG	CC	CC	GG	TT	TT	CC	GG	TT	TT	TT	CC	GG	CC	CC	AA	CC	GG	CC	0.1187	0.246	0.1707	-0.01462	-1.4352	13.9188	0.2597	CC	AA	NN	GG	CC	CC	GG	TT	AA	1.2501
WSU	lax	2+12	Rht1	QAM065	J950052-001	CC	CC	GG	AA	GG	CC	CC	GG	TT	TT	CC	AA	TT	TT	TT	AA	GG	TT	CC	GG	CC	GG	CC	-0.02532	-1.2637	-0.5568	-0.00103	1.3557	14.4618	1.2731	CC	GG	AA	GG	CC	CC	GG	TT	AA	-0.5896
WSU	lax	2+12	Rht1	QAM066	J950056-004	CC	CC	GG	AA	AA	CC	AA	GG	TT	TT	CC	GG	TT	TT	CC	CC	GG	TT	CC	AA	CC	GG	CC	-0.01582	1.2177	1.9345	8.9e-05	-3.0623	9.3935	-1.4076	CC	GG	AA	AA	CC	AA	GG	TT	GG	2.353
WSU	lax	2+12	Rht1	QAM067	J950060-001	TT	CC	GG	AA	AA	CC	CC	GG	TT	TT	CC	GG	CC	TT	TT	CC	GG	TT	CC	GG	CC	GG	CC	-0.0683	-0.8245	0.1554	0.01769	-0.0418	1.4633	0.2574	CC	GG	AA	AA	CC	CC	GG	TT	GG	-1.1728
WSU	lax	2+12	Rht1	QAM068	J950077-003	CC	CC	GG	AA	AA	CC	AA	GG	TT	TT	CC	GG	CC	TT	CC	CC	GG	TT	CC	AA	CC	GG	CC	0.02443	-0.211	0.1926	0.00205	3.4127	-1.9155	1.0635	CC	GG	AA	AA	CC	AA	GG	TT	AA	0.1016
WSU	lax	2+12	.	QAM069	J950077-004	CC	CC	GG	AA	AA	CC	AA	GG	TT	TT	CC	GG	CC	TT	TT	CC	GG	TT	CC	AA	CC	GG	CC	-0.05489	-0.4421	0.2118	0.003812	1.6884	0.7854	1.5842	CC	GG	AA	AA	CC	AA	GG	TT	AA	0.0276
WSU	lax	2+12	Rht1	QAM070	J950081-001	CC	CC	GG	AA	AA	TT	CC	GG	TT	TT	CC	GG	CC	TT	TC	CC	GG	TT	TT	AA	CC	GG	CC	-0.2138	-1.0832	-1.4628	0.009411	2.0855	3.3296	2.1977	CC	GG	AA	AA	TT	CC	GG	TT	AA	-2.5083
WSU	lax	2+12	Rht1	QAM071	J950086-002	CC	CC	GG	GG	GG	CC	CC	AA	TT	TT	CC	GG	TT	TT	TC	CC	GG	TT	CC	AA	CC	GG	CC	-0.1868	-3.4124	-1.3265	0.008853	4.6673	11.0226	3.2548	CC	GG	GG	GG	CC	CC	AA	TT	GG	-2.3523
WSU	lax	2+12	Rht1	QAM072	J950087-001	CC	CC	GG	AA	NN	CC	NN	AA	TT	TT	CC	GG	TT	TT	NN	CC	GG	TT	CC	AA	CC	GG	CC	0.01102	0.06713	-0.5081	0.0153	0.122	-3.2884	0.5174	CC	GG	AA	NN	CC	NN	AA	TT	GG	-1.7797
WSU	club	2+12	Rht1	QAM073	J950114-001	CC	CC	GG	AA	NN	CC	AA	GG	TT	TT	CC	GG	CC	TT	TC	CC	GG	TT	CC	GG	CC	GG	CC	0.1238	0.6499	0.302	0.004986	-0.4377	-4.0918	0.4946	CC	GG	AA	NN	CC	AA	GG	TT	NN	0.03015
WSU	club	2+12	Rht1	QAM074	J950114-002	CC	CC	GG	AA	AA	CC	AA	GG	TT	TT	CC	GG	CC	TT	CC	CC	GG	TT	CC	GG	CC	GG	CC	0.05705	-0.5493	-0.2202	-0.00621	-1.0245	-3.0057	0.6708	CC	GG	AA	AA	CC	AA	GG	TT	GG	0.1659
WSU	lax	2+12	.	QAM075	J950274-001	CC	CC	GG	GG	GG	CC	CC	GG	TT	TT	CC	GG	TT	TT	TT	CC	GG	TT	CC	AA	CC	GG	CC	-0.03297	-4.1115	-1.4527	0.003167	4.5499	11.4751	3.1373	CC	GG	GG	GG	CC	CC	GG	TT	AA	-2
WSU	lax	2+12	Rht1	QAM076	J950276-001	CC	CC	GG	GG	GG	TT	CC	GG	TT	TT	CC	GG	TT	TT	TC	CC	GG	TT	TT	GG	CC	GG	CC	0.06936	-1.7785	-2.9779	0.007091	-0.4377	19.0776	0.4946	CC	GG	GG	GG	TT	CC	GG	TT	NN	-4.2221
WSU	club	2+12	Rht2	QAM077	J950285-001	CC	CC	AA	GG	AA	TT	CC	GG	CC	TT	CC	GG	TT	CC	TT	CC	GG	TT	TT	AA	TT	GG	CC	0.3867	-0.2254	0.2263	0.008807	-3.1369	-18.7537	-0.6212	CC	AA	GG	AA	TT	CC	GG	CC	GG	-0.3937
WSU	club	2+12	Rht2	QAM078	J950285-002	CC	CC	AA	GG	AA	CC	CC	GG	TT	TT	CC	GG	CC	CC	TT	CC	GG	TT	CC	AA	TC	GG	CC	0.3381	-0.1622	0.136	0.01511	-2.3154	-17.6676	-0.2688	CC	AA	GG	AA	CC	CC	GG	TT	GG	-0.9455
WSU	lax	5+10	Rht1	QAM079	J950289-001	CC	CC	GG	AA	AA	CC	CC	GG	TT	TT	CC	GG	CC	TT	TT	AA	GG	TT	CC	NN	CC	GG	CC	-0.1872	-2.7189	-0.9926	-0.01023	0.5052	27.7661	2.42	CC	GG	AA	AA	CC	CC	GG	TT	AA	-0.4665
WSU	lax	2+12	Rht1	QAM080	J950297-003	CC	CC	AA	AA	AA	TT	CC	GG	TT	TT	CC	GG	CC	TT	TT	CC	GG	TT	TT	AA	CC	GG	CC	0.01946	-0.65	-0.7646	-0.00979	0.5598	5.4113	1.1406	CC	AA	AA	AA	TT	CC	GG	TT	GG	-0.2433
WSU	lax	2+12	Rht2	QAM081	J950297-004	CC	CC	AA	AA	AA	CC	CC	GG	TT	TT	CC	GG	TT	TT	TT	CC	GG	TT	CC	AA	CC	GG	CC	0.04757	-0.5201	-0.7711	0.001492	1.8413	-0.9552	1.1196	CC	AA	AA	AA	CC	CC	GG	TT	GG	-1.1049
WSU	lax	2+12	Rht2	QAM082	J950297-005	CC	CC	GG	AA	AA	CC	CC	GG	TT	TT	CC	GG	TT	TT	TT	CC	GG	TT	CC	AA	CC	GG	CC	0.1308	2.8485	1.5418	-0.01285	-2.3154	18.5345	-0.445	CC	GG	AA	AA	CC	CC	GG	TT	AA	2.8353
WSU	lax	2+12	.	QAM083	J950298-006	CC	TC	GG	AA	AA	CC	AA	GG	TT	TT	TC	GG	CC	TT	TC	CC	GG	TT	CC	AA	CC	GG	TC	-0.02032	-1.2759	0.267	0.008487	1.4037	-5.8055	0.4913	TC	GG	AA	AA	CC	AA	GG	TT	AA	-0.3446
WSU	lax	2+12	Rht1	QAM084	J950315-001	CC	CC	GG	AA	GG	TT	AA	GG	NN	TT	CC	GG	TT	TT	TT	AA	GG	CC	TT	GG	TC	GG	CC	0.01946	2.7356	-0.05777	0.002488	-0.6137	17.6295	0.3185	CC	GG	AA	GG	TT	AA	GG	NN	GG	-0.2793
WSU	lax	H	wildtype	QAM085	J950346-01	CC	CC	GG	GG	GG	TT	CC	GG	TT	TT	CC	AA	TT	TT	TC	AA	GG	TT	TT	AA	CC	GG	CC	-0.1367	-2.339	-2.8062	-0.00591	2.2615	26.5895	1.9041	CC	GG	GG	GG	TT	CC	GG	TT	AA	-3.0164
WSU	lax	H	Rht2	QAM086	J950370-02	CC	CC	GG	AA	AA	TT	CC	GG	TT	TT	CC	GG	TT	TT	TT	CC	GG	TT	TT	AA	CC	GG	CC	-0.09634	-2.1058	-0.4984	-0.00591	0.7359	16.8149	0.6121	CC	GG	AA	AA	TT	CC	GG	TT	GG	-0.162
WSU	lax	5+10	Rht1	QAM087	J950409-10-2	CC	CC	GG	AA	AA	CC	AA	GG	TT	TT	CC	GG	CC	CC	CC	CC	GG	TT	CC	AA	CC	GG	CC	-0.1156	-1.3864	-1.1445	-0.00016	-1.9047	20.7972	0.1423	CC	GG	AA	AA	CC	AA	GG	TT	AA	-1.3842
WSU	lax	H	Rht1	QAM088	J950409-10-3	TT	CC	GG	GG	AA	TT	AA	GG	TT	TT	CC	GG	CC	TT	TC	CC	GG	TT	TT	AA	CC	GG	CC	0.03054	-1.0021	-1.394	-0.01822	-0.4964	13.5567	0.7883	CC	GG	GG	AA	TT	AA	GG	TT	AA	-0.3969
WSU	lax	H	Rht1	QAM089	J950409-10-4	CC	CC	AA	GG	GG	NN	CC	GG	TT	TT	CC	GG	NN	TT	TC	NN	GG	TT	NN	NN	CC	GG	CC	-0.06767	-0.6706	-1.4724	-0.01023	-0.08564	1.791	0.847	CC	AA	GG	GG	NN	CC	GG	TT	NN	-1.0682
WSU	lax	2+12	Rht1	QAM090	J950409-10-5	CC	CC	AA	GG	AA	CC	CC	GG	TT	TT	CC	GG	CC	CC	CC	CC	GG	TT	CC	AA	CC	GG	CC	-0.05891	-0.9669	-1.3754	-0.01962	0.5549	6.8317	0.1349	CC	AA	GG	AA	CC	CC	GG	TT	GG	-0.2826
WSU	lax	2+12	Rht1	QAM091	J950411-02	CC	CC	NN	AA	GG	CC	AA	AA	TT	TT	CC	GG	CC	TT	TT	CC	GG	TT	CC	AA	CC	GG	CC	-0.05059	1.1931	0.7622	-0.00663	-0.09936	-10.4563	0.7324	CC	NN	AA	GG	CC	AA	AA	TT	AA	1.3754
WSU	lax	2+12	Rht2	QAM092	J950411-03	CC	CC	AA	AA	AA	TT	CC	GG	TT	TT	CC	GG	TT	TT	TT	CC	GG	TT	TT	AA	CC	GG	CC	0.04633	0.1851	-0.839	-0.00211	1.9681	0.07144	0.1423	CC	AA	AA	AA	TT	CC	GG	TT	GG	-0.8914
WSU	lax	2+12	wildtype	QAM093	J950411-05	CC	CC	GG	AA	AA	CC	AA	AA	CC	TT	CC	GG	CC	CC	TT	CC	GG	TT	CC	AA	TT	GG	CC	0.06655	3.6478	0.9879	-0.00252	-1.0245	-3.4583	0.3185	CC	GG	AA	AA	CC	AA	AA	CC	AA	1.4058
WSU	lax	2+12	Rht1	QAM095	J950412-01	CC	CC	AA	GG	GG	CC	AA	GG	CC	TT	CC	GG	CC	TT	TT	CC	GG	TT	CC	AA	TT	GG	CC	0.1327	3.345	1.1884	-0.01899	-2.6088	-0.9241	0.6121	CC	AA	GG	GG	CC	AA	GG	CC	AA	2.8533
WSU	lax	2+12	Rht1	QAM096	J960670-1	CC	CC	GG	AA	AA	CC	AA	GG	TT	NN	CC	GG	CC	TT	CC	CC	GG	CC	CC	AA	CC	GG	CC	-0.1045	-0.5065	0.4787	0.00676	0.9706	6.7688	-0.7973	CC	GG	AA	AA	CC	AA	GG	TT	GG	0.04965
WSU	lax	H	Rht1	QAM097	J960678-5	CC	CC	AA	GG	GG	TT	CC	GG	TT	TT	CC	GG	TT	TT	TT	AA	AA	NN	TT	GG	CC	AA	CC	0.01134	0.5609	-0.3932	0.001236	0.9119	15.0048	0.201	CC	AA	GG	GG	TT	CC	GG	TT	AA	-0.5751
WSU	lax	2+12	Rht1	QAM098	J960793-1	CC	CC	GG	GG	GG	CC	AA	GG	TT	TT	CC	GG	TT	TT	CC	CC	GG	TT	CC	AA	CC	GG	CC	-0.1739	-1.131	-1.739	0.02701	0.1491	7.7644	0.9057	CC	GG	GG	GG	CC	AA	GG	TT	GG	-4.1043
WSU	lax	2+12	Rht1	QAM099	J960793-3	CC	CC	GG	GG	GG	CC	AA	GG	TT	TT	CC	GG	TT	TT	CC	CC	GG	TT	CC	AA	CC	GG	CC	-0.1765	-1.1757	-1.9586	0.02933	-0.08564	14.0093	0.6708	CC	GG	GG	GG	CC	AA	GG	TT	GG	-4.5011
WSU	lax	H	Rht1	QAM100	J960793-4	CC	CC	GG	GG	GG	CC	AA	GG	TT	TT	CC	GG	TT	TT	CC	CC	GG	TT	CC	AA	CC	GG	CC	-0.09665	-1.2967	-1.8645	0.02302	-0.6137	14.8238	-0.2688	CC	GG	GG	GG	CC	AA	GG	TT	GG	-3.967
WSU	lax	5+10	wildtype	QAM101	J960794-2	CC	NN	AA	GG	GG	CC	CC	NN	TT	TT	NN	GG	TT	TT	TT	CC	GG	TT	CC	GG	CC	GG	NN	0.02669	1.6668	0.295	-0.02331	-0.7898	21.3402	-0.7386	NN	AA	GG	GG	CC	CC	NN	TT	GG	2.1074
WSU	lax	2+12	Rht1	QAM102	J960805-2	CC	CC	GG	AA	AA	TT	CC	GG	TT	TT	CC	GG	CC	TT	CC	CC	GG	TT	TT	GG	CC	GG	CC	-0.1263	0.4378	-0.07802	-0.01361	-1.405	1.4158	-0.8561	CC	GG	AA	AA	TT	CC	GG	TT	AA	0.8778
WSU	lax	2+12	Rht1	QAM103	J960805-4	CC	CC	GG	AA	AA	TT	CC	GG	TT	TT	CC	GG	CC	TT	CC	CC	GG	TT	TT	GG	CC	GG	CC	-0.00686	0.4644	-0.01699	-0.01346	-0.5544	0.7982	-0.7973	CC	GG	AA	AA	TT	CC	GG	TT	AA	0.9348
WSU	club	5+10	Rht2	QAM104	J961024-1	CC	CC	AA	GG	AA	CC	NN	AA	TT	TT	CC	GG	CC	CC	TT	CC	GG	CC	CC	AA	CC	GG	CC	0.1979	2.4813	1.6064	-0.014	0.5613	-6.1697	0.4977	CC	AA	GG	AA	CC	NN	AA	TT	AA	3.051
WSU	club	2+12	Rht2	QAM105	J961024-2	CC	CC	AA	GG	AA	CC	AA	AA	TT	TT	CC	GG	CC	CC	TT	CC	GG	CC	CC	AA	CC	GG	CC	0.07873	1.6711	1.5594	-0.014	1.0473	-19.5035	0.7138	CC	AA	GG	AA	CC	AA	AA	TT	AA	2.9747
WSU	lax	2+12	Rht1	QAM106	J961042-2	CC	CC	GG	AA	GG	CC	AA	GG	TT	TT	CC	GG	TT	TT	CC	CC	GG	TT	CC	AA	CC	GG	CC	-0.00209	1.238	0.853	0.005839	1.264	0.9765	1.0232	CC	GG	AA	GG	CC	AA	GG	TT	GG	0.6311
WSU	lax	2+12	wildtype	QAM107	J961101-1	CC	CC	GG	AA	AA	CC	AA	GG	TT	TT	CC	GG	CC	TT	CC	CC	AA	TT	CC	AA	CC	AA	CC	-0.03423	-4.7804	-2.4969	-0.01325	0.5598	5.9543	1.0819	CC	GG	AA	AA	CC	AA	GG	TT	AA	-1.929
WSU	lax	2+12	Rht1	QAM108	J961167-1	CC	CC	GG	AA	AA	CC	NN	GG	TT	TT	CC	GG	CC	CC	NN	CC	GG	TT	CC	GG	CC	GG	CC	-0.01745	-0.04853	-0.1328	-0.0049	0.6772	3.8727	1.0232	CC	GG	AA	AA	CC	NN	GG	TT	AA	0.217
WSU	lax	5+10	.	QAM109	J961273-1	CC	CC	AA	GG	AA	TT	CC	GG	TT	TT	CC	GG	TT	TT	TT	CC	GG	TT	TT	AA	CC	GG	CC	0.05141	-1.0013	-0.4138	-0.01076	-0.379	6.5878	-0.3275	CC	AA	GG	AA	TT	CC	GG	TT	GG	0.2736
WSU	lax	H	Rht1	QAM110	J970041-5	CC	CC	GG	AA	NN	NN	CC	GG	TT	TT	CC	GG	CC	CC	CC	AA	GG	TT	NN	GG	CC	GG	CC	-0.09987	-1.4072	-2.0526	-0.00757	1.1466	13.2852	1.0232	CC	GG	AA	NN	NN	CC	GG	TT	AA	-1.9836
WSU	lax	5+10	Rht1	QAM111	J970055-4	CC	CC	GG	GG	GG	TT	CC	GG	TT	TT	CC	AA	TT	TT	TT	AA	GG	TT	TT	GG	CC	GG	CC	0.06507	-1.6059	-0.6536	-0.01257	0.03172	24.4174	0.5534	CC	GG	GG	GG	TT	CC	GG	TT	AA	0.163
WSU	lax	5+10	Rht1	QAM112	J970057-1	CC	CC	GG	AA	GG	TT	CC	GG	TT	TT	CC	GG	TT	TT	TT	AA	GG	TT	TT	GG	CC	GG	CC	-0.06351	-1.3802	-1.1	-0.02638	0.5598	66.2308	1.2581	CC	GG	AA	GG	TT	CC	GG	TT	AA	0.6311
WSU	lax	5+10	Rht1	QAM113	J970057-2	CC	CC	GG	AA	GG	TT	CC	GG	TT	TT	CC	GG	TT	TT	TT	CC	GG	TT	TT	GG	CC	GG	CC	-0.1057	-0.4774	-0.5234	-0.02178	0.5011	44.419	1.1994	CC	GG	AA	GG	TT	CC	GG	TT	AA	0.9912
WSU	lax	5+10	Rht1	QAM114	J970057-3	CC	CC	GG	AA	GG	CC	CC	GG	TT	TT	CC	GG	TT	TT	TT	CC	GG	TT	CC	GG	CC	GG	CC	0.02678	-0.388	-0.7745	-0.01351	-0.9658	36.8166	-0.3275	CC	GG	AA	GG	CC	CC	GG	TT	AA	0.07394
WSU	club	5+10	Rht1	QAM115	J970057-5	CC	CC	GG	AA	GG	NN	CC	GG	TT	TT	CC	GG	TT	TT	TT	AA	GG	TT	NN	GG	CC	GG	CC	-0.1901	-0.862	-1.1279	-0.00277	-0.8485	36.7261	0.1423	CC	GG	AA	GG	NN	CC	GG	TT	AA	-1.1683
WSU	lax	H	Rht1	QAM116	J970057-9	CC	CC	AA	AA	AA	CC	AA	GG	TT	TT	CC	AA	CC	TT	CC	AA	GG	TT	CC	GG	CC	GG	CC	0.05568	0.5829	0.03234	-0.0084	-1.7873	14.9143	-0.6799	CC	AA	AA	AA	CC	AA	GG	TT	GG	0.6558
WSU	lax	5+10	Rht1	QAM117	J970062-6	CC	CC	NN	AA	GG	TT	CC	GG	TT	TT	CC	AA	TT	TT	TT	AA	GG	TT	TT	GG	CC	GG	CC	0.0574	0.7414	-0.2258	-0.00797	-1.3179	30.2097	-0.5037	CC	NN	AA	GG	TT	CC	GG	TT	AA	0.3431
WSU	lax	H	Rht1	QAM118	J970067-1	CC	CC	GG	GG	GG	TT	CC	GG	TT	TT	CC	GG	TT	TT	TT	AA	GG	TT	TT	GG	CC	GG	CC	0.09011	0.3794	-1.3697	-0.01351	-0.08564	31.1148	0.9645	CC	GG	GG	GG	TT	CC	GG	TT	AA	-0.6642
WSU	lax	5+10	Rht1	QAM119	J970067-9	CC	CC	GG	AA	GG	TT	CC	GG	TT	TT	CC	GG	TT	TT	TT	AA	GG	TT	TT	GG	CC	GG	CC	0.1495	1.1026	-0.07697	-0.00797	-0.6724	18.806	-0.1513	CC	GG	AA	GG	TT	CC	GG	TT	AA	0.5411
WSU	lax	H	.	QAM121	J970092-3	CC	CC	GG	AA	GG	TT	CC	GG	TT	TT	CC	AA	TT	TT	CC	NN	GG	TT	TT	GG	CC	GG	CC	-0.03272	-2.4645	-3.4714	-0.03652	2.6722	18.806	1.1406	CC	GG	AA	GG	TT	CC	GG	TT	AA	-1.5464
WSU	lax	5+10	wildtype	QAM122	J970157-2	CC	CC	AA	AA	AA	TT	CC	GG	TT	TT	CC	GG	TT	TT	CC	CC	GG	TT	TT	AA	CC	GG	CC	0.07093	0.2252	-0.6591	0.000988	1.3813	24.3269	1.0819	CC	AA	AA	AA	TT	CC	GG	TT	GG	-0.8665
WSU	lax	5+10	Rht1	QAM123	J970245-1	CC	TC	NN	NN	GG	CC	NN	GG	TT	TT	TC	NN	TT	TT	TC	AA	GG	CC	CC	GG	CC	GG	TC	0.04588	-0.5451	-0.3746	-0.00797	-0.7311	22.1547	-0.3862	TC	NN	NN	GG	CC	NN	GG	TT	NN	0.163
WSU	lax	H	Rht1	QAM124	J970284-2	CC	CC	AA	AA	AA	CC	AA	GG	TT	TT	CC	GG	CC	TT	CC	CC	GG	TT	CC	AA	CC	GG	CC	-5e-05	0.9683	-0.5785	-0.01689	0.9706	-2.9152	0.08356	CC	AA	AA	AA	CC	AA	GG	TT	AA	0.5185
WSU	lax	2+12	Rht1	QAM125	J970536-1	CC	CC	AA	AA	GG	TT	AA	GG	TT	TT	CC	GG	TT	TT	TT	CC	GG	TT	TT	GG	CC	GG	CC	-0.01132	-2.512	-1.4097	-0.02886	1.2053	0.07144	1.1406	CC	AA	AA	GG	TT	AA	GG	TT	GG	0.3659
WSU	lax	5+10	Rht1	QAM126	J970611-1	CC	CC	GG	AA	GG	TT	CC	GG	TT	TT	CC	AA	TT	TT	TT	AA	GG	TT	TT	GG	CC	GG	CC	-0.1394	-4.3305	-4.0922	-0.01103	2.9656	18.1725	3.0199	CC	GG	AA	GG	TT	CC	GG	TT	AA	-4.1507
WSU	lax	5+10	Rht1	QAM127	J970812-6	CC	CC	GG	AA	GG	TT	CC	GG	TT	TT	CC	AA	TT	TT	TT	AA	GG	TT	TT	GG	CC	GG	CC	-0.2028	-2.9377	-0.8078	-0.00923	4.1979	20.0731	1.9041	CC	GG	AA	GG	TT	CC	GG	TT	AA	-0.2738
WSU	lax	2+12	Rht1	QAM128	J970984-2	CC	CC	GG	AA	AA	CC	AA	GG	TT	TT	CC	GG	CC	TT	CC	CC	GG	TT	CC	AA	CC	GG	CC	-0.1615	-1.6725	0.3644	0.00676	0.5598	11.2036	1.6692	CC	GG	AA	AA	CC	AA	GG	TT	AA	-0.08208
WSU	lax	H	Rht2	QAM129	J971058-2	CC	CC	GG	GG	AA	TT	CC	AA	TT	TT	CC	GG	CC	CC	TT	CC	GG	CC	TT	AA	CC	GG	CC	-0.04729	-1.0109	0.1985	0.006582	3.1103	-19.5376	0.1423	CC	GG	GG	AA	TT	CC	AA	TT	GG	-0.2099
WSU	lax	H	Rht1	QAM130	J971186-1	CC	CC	GG	AA	GG	TT	CC	GG	TT	TT	CC	AA	TT	TT	NN	AA	GG	TT	TT	GG	CC	GG	CC	0.02477	-0.7031	-0.8768	-0.01564	1.1466	29.9382	0.7296	CC	GG	AA	GG	TT	CC	GG	TT	AA	0.109
WSU	lax	5+10	Rht1	QAM131	J971221-1	CC	CC	GG	AA	GG	TT	CC	GG	TT	TT	CC	AA	TT	TT	TT	AA	GG	TT	TT	GG	CC	GG	CC	0.04972	-1.967	-2.3275	-0.01718	2.4375	30.3002	0.6708	CC	GG	AA	GG	TT	CC	GG	TT	AA	-1.5653
WSU	lax	5+10	Rht1	QAM132	J971236-1	CC	CC	GG	AA	GG	TT	CC	GG	TT	TT	CC	AA	TT	TT	TT	AA	GG	TT	TT	GG	CC	GG	CC	0.01326	-0.2742	-1.1929	-0.01104	1.9094	30.2097	0.2597	CC	GG	AA	GG	TT	CC	GG	TT	AA	-0.6111
WSU	lax	5+10	Rht1	QAM133	J971249-1	CC	CC	GG	AA	GG	TT	CC	GG	TT	TT	CC	AA	TT	TT	TC	AA	GG	TT	TT	GG	CC	GG	CC	-0.07919	-1.3065	-1.6876	-0.0049	2.2028	25.1414	0.6708	CC	GG	AA	GG	TT	CC	GG	TT	AA	-1.6778
WSU	lax	5+10	Rht2	QAM134	J980032-3	CC	CC	GG	AA	GG	NN	AA	AA	CC	TT	CC	GG	TT	TT	TC	NN	GG	TT	NN	GG	TC	GG	CC	-0.0403	2.7571	1.3812	0.005658	1.6747	31.9293	-0.03389	CC	GG	AA	GG	NN	AA	AA	CC	AA	1.2584
WSU	lax	5+10	Rht2	QAM135	J980032-5	CC	CC	GG	AA	GG	CC	AA	AA	CC	GG	CC	GG	TT	TT	CC	AA	GG	TT	CC	GG	TC	GG	CC	-0.0328	1.1026	0.6112	0.005839	0.03172	38.5362	-0.2688	CC	GG	AA	GG	CC	AA	AA	CC	AA	0.3431
WSU	lax	5+10	Rht1	QAM136	J980042-1	CC	CC	GG	AA	GG	CC	AA	GG	TT	TT	CC	GG	TT	TT	TC	AA	GG	TT	CC	GG	CC	GG	CC	-0.01097	0.5474	0.2077	-0.00824	0.4425	25.1414	0.4946	CC	GG	AA	GG	CC	AA	GG	TT	AA	0.8783
WSU	lax	2+12	Rht1	QAM137	J980042-2	CC	CC	GG	GG	GG	CC	CC	GG	TT	TT	CC	GG	TT	TT	CC	CC	GG	TT	CC	GG	CC	GG	CC	0.07347	0.2088	0.2263	-0.01745	0.7945	18.9871	-0.5624	CC	GG	GG	GG	CC	CC	GG	TT	AA	1.5804
WSU	lax	H	Rht1	QAM138	J980407-1	CC	CC	GG	AA	AA	CC	AA	GG	TT	TT	CC	GG	CC	TT	NN	CC	GG	TT	CC	AA	CC	GG	CC	-0.0879	-0.2733	0.5701	0.001323	0.2078	7.4929	0.2597	CC	GG	AA	AA	CC	AA	GG	TT	AA	0.5986
WSU	lax	2+12	Rht1	QAM139	J980408-2	CC	CC	GG	AA	AA	CC	AA	GG	TT	TT	CC	GG	CC	TT	CC	CC	GG	TT	CC	AA	CC	GG	CC	-0.06653	0.1931	1.0499	0.008572	-0.4377	11.2941	0.2597	CC	GG	AA	AA	CC	AA	GG	TT	AA	0.6205
WSU	lax	2+12	Rht1	QAM140	J980409-3	CC	CC	GG	AA	AA	CC	AA	GG	TT	TT	CC	GG	CC	TT	CC	CC	GG	TT	CC	AA	CC	GG	CC	-0.1011	-0.5477	0.5092	0.01033	0.7359	11.6561	1.5517	CC	GG	AA	AA	CC	AA	GG	TT	AA	-0.1412
WSU	lax	5+10	Rht2	QAM141	J980498-4	CC	CC	GG	AA	AA	TT	CC	AA	TT	TT	CC	GG	CC	CC	TT	CC	GG	CC	TT	AA	CC	GG	CC	-0.2263	1.6303	0.7924	-0.00766	1.3588	4.8156	0.4946	CC	GG	AA	AA	TT	CC	AA	TT	GG	1.5398
WSU	lax	2+12	Rht1	QAM142	J981358-2	CC	CC	GG	AA	AA	CC	AA	GG	TT	TT	CC	GG	CC	TT	CC	CC	GG	TT	CC	AA	CC	GG	CC	-0.08553	0.07653	1.0499	-0.00411	-0.8485	9.2125	0.4946	CC	GG	AA	AA	CC	AA	GG	TT	AA	1.6086
WSU	lax	2+12	Rht1	QAM143	J98407-1	CC	CC	GG	AA	AA	CC	AA	GG	TT	TT	CC	GG	CC	TT	CC	CC	GG	TT	CC	AA	CC	GG	CC	-0.08429	-1.6443	-0.3751	0.000562	0.4425	3.7822	1.3755	CC	GG	AA	AA	CC	AA	GG	TT	AA	-0.5449
WSU	lax	H	Rht1	QAM144	J98408-2	CC	TC	GG	NN	NN	CC	AA	GG	TT	TT	TC	GG	CC	TT	NN	CC	GG	TT	CC	AA	CC	GG	TC	-0.09379	-1.8192	-0.3294	-0.00488	0.5011	-0.01907	1.493	TC	GG	NN	NN	CC	AA	GG	TT	AA	-0.03987
USDA-ARS	club	5+10	Rht2	QAM145	ARS010762-2C	CC	CC	GG	GG	AA	CC	AA	AA	TT	TT	CC	GG	CC	CC	TT	CC	GG	CC	CC	GG	NN	GG	CC	0.1601	2.2127	-0.3421	-0.00682	-0.9071	-15.224	-0.6799	CC	GG	GG	AA	CC	AA	AA	TT	AA	0.1166
WSU	lax	2+12	Rht1	QAM146	J98C0002	CC	CC	GG	AA	GG	CC	AA	GG	TT	TT	CC	GG	TT	TT	CC	CC	GG	TT	CC	GG	CC	GG	CC	0.02131	-1.8047	-0.3166	-0.01389	-0.7898	0.524	0.3772	CC	GG	AA	GG	CC	AA	GG	TT	AA	0.8578
USDA-ARS	club	5+10	Rht2	QAM147	ARS010769-6C	CC	CC	AA	GG	AA	CC	CC	AA	CC	TT	CC	GG	CC	CC	TT	CC	GG	TT	CC	GG	TT	GG	CC	0.07695	0.9885	-0.5478	-0.01769	0.4425	-10.3367	-0.09261	CC	AA	GG	AA	CC	CC	AA	CC	AA	0.6875
U of I	lax	2+12	Rht1	QAM148	JSDM034	CC	CC	AA	AA	GG	CC	CC	GG	TT	TT	CC	GG	CC	TT	TT	CC	AA	TT	CC	GG	CC	AA	CC	-0.04314	-1.0476	-0.286	0.002762	-0.08564	6.7688	0.847	CC	AA	AA	GG	CC	CC	GG	TT	AA	-0.6239
U of I	lax	2+12	Rht1	QAM149	JSDM036	CC	CC	GG	GG	GG	TT	CC	GG	TT	TT	CC	GG	TT	TT	TC	CC	AA	TT	TT	NN	CC	AA	CC	-0.2164	-2.499	-0.6174	-0.01341	2.2028	16.2719	2.0803	CC	GG	GG	GG	TT	CC	GG	TT	AA	0.2538
WSU	lax	2+12	Rht1	QAM150	LEWJAIN	CC	CC	GG	GG	GG	TT	AA	GG	TT	TT	CC	GG	TT	TT	TC	CC	GG	TT	TT	GG	CC	GG	CC	0.06194	0.09374	-0.8322	-0.01314	1.5875	2.3341	-0.229	CC	GG	GG	GG	TT	AA	GG	TT	AA	-0.3239
OSU	club	2+12	wildtype	QAM151	MORO	CC	CC	GG	GG	GG	CC	AA	AA	CC	TT	CC	AA	TT	TT	TT	CC	GG	TT	CC	AA	TT	GG	CC	0.1128	1.7222	1.3404	0.01274	-1.2834	-8.4361	-0.8606	CC	GG	GG	GG	CC	AA	AA	CC	GG	0.7862
WSU	lax	2+12	Rht1	QAM152	N92163-1	CC	CC	GG	AA	AA	CC	AA	GG	TT	TT	CC	GG	CC	TT	CC	CC	GG	TT	CC	AA	CC	GG	CC	-0.08287	-0.5052	0.2995	-0.0012	-0.9612	0.5131	0.9645	CC	GG	AA	AA	CC	AA	GG	TT	AA	0.4592
WSU	lax	2+12	.	QAM153	N92172-7	CC	CC	GG	GG	GG	NN	CC	AA	TT	TT	CC	GG	CC	TT	NN	CC	GG	CC	NN	GG	TC	GG	CC	0.06842	-1.8164	-1.5639	-0.02076	1.2053	-12.3278	1.2581	CC	GG	GG	GG	NN	CC	AA	TT	GG	-0.2143
WSU	lax	2+12	Rht2	QAM154	SSD01089	CC	CC	AA	AA	GG	TT	CC	GG	TT	TT	CC	GG	TT	TT	TT	CC	GG	CC	TT	AA	CC	GG	CC	-0.1074	-0.2487	-0.7107	-0.02182	4.3152	-0.8336	1.1406	CC	AA	AA	GG	TT	CC	GG	TT	GG	0.6134
WSU	lax	2+12	Rht1	QAM155	SSD01096	CC	CC	AA	AA	AA	TT	AA	GG	TT	TT	CC	GG	TT	TT	TT	CC	GG	TT	TT	AA	CC	GG	CC	0.08058	1.1825	1.3409	-0.02977	0.8508	1.7958	0.6529	CC	AA	AA	AA	TT	AA	GG	TT	GG	3.7198
WSU	lax	2+12	Rht1	QAM156	SSD02046	CC	CC	GG	AA	AA	CC	AA	GG	TT	TT	CC	GG	CC	TT	CC	CC	GG	TT	CC	GG	CC	GG	CC	-0.01489	-0.776	-0.1079	0.008958	0.878	4.7681	1.2649	CC	GG	AA	AA	CC	AA	GG	TT	AA	-0.794
WSU	lax	2+12	Rht1	QAM157	SSD02047	CC	CC	GG	AA	AA	CC	AA	GG	TT	TT	CC	GG	CC	TT	CC	CC	GG	TT	CC	NN	CC	GG	CC	-0.02579	0.5993	1.0281	0.001617	1.1369	3.9129	0.4509	CC	GG	AA	AA	CC	AA	GG	TT	AA	1.1634
WSU	lax	2+12	Rht1	QAM158	SSD02053	CC	CC	GG	AA	AA	CC	AA	GG	TT	TT	CC	GG	CC	TT	CC	CC	GG	TT	CC	AA	CC	GG	CC	-0.08016	-0.5916	0.02124	-0.00619	0.5598	6.8593	1.493	CC	GG	AA	AA	CC	AA	GG	TT	AA	0.4284
WSU	lax	2+12	Rht1	QAM159	SSD02065	CC	CC	GG	AA	GG	CC	AA	GG	TT	TT	CC	GG	TT	TT	CC	CC	GG	TT	CC	GG	CC	GG	CC	-0.06302	-1.2542	0.7812	0.007798	-0.6137	1.3385	1.0819	CC	GG	AA	GG	CC	AA	GG	TT	AA	0.3747
USDA-ARS	club	5+10	Rht2	QAM160	ARS990077-1C	CC	CC	AA	GG	AA	CC	AA	AA	CC	TT	CC	GG	CC	CC	TT	CC	GG	TT	CC	GG	TT	GG	CC	0.1927	2.2619	1.4155	-6e-05	-2.6088	-15.1335	-1.4433	CC	AA	GG	AA	CC	AA	AA	CC	AA	1.7776
WSU	lax	2+12	Rht1	QAM161	SSD02069	CC	CC	GG	AA	AA	CC	AA	GG	TT	TT	CC	GG	CC	TT	CC	CC	GG	TT	CC	AA	CC	GG	CC	-0.1172	-1.2839	-0.05898	0.009155	1.0292	6.4973	0.6708	CC	GG	AA	AA	CC	AA	GG	TT	AA	-0.7563
WSU	lax	2+12	Rht1	QAM162	SSD02071	CC	CC	GG	AA	AA	CC	AA	GG	TT	TT	CC	GG	CC	TT	CC	CC	GG	TT	CC	AA	CC	GG	CC	-0.06798	-1.6567	1.1771	0.006552	-0.4964	4.0537	0.6708	CC	GG	AA	AA	CC	AA	GG	TT	AA	0.9693
WSU	lax	2+12	Rht1	QAM163	SSD02072	CC	CC	GG	AA	AA	CC	AA	GG	TT	TT	CC	GG	CC	TT	CC	CC	GG	TT	CC	AA	CC	GG	CC	-0.06565	0.28	1.0169	0.01525	2.6161	3.4854	0.3399	CC	GG	AA	AA	CC	AA	GG	TT	AA	0.1915
WSU	lax	2+12	Rht1	QAM164	SSD060015	CC	CC	AA	GG	AA	CC	AA	GG	TT	TT	CC	GG	CC	TT	TT	CC	GG	NN	CC	GG	CC	GG	CC	-0.05897	0.4906	0.6535	0.009027	1.7749	-3.6393	0.2597	CC	AA	GG	AA	CC	AA	GG	TT	AA	0.2891
WSU	lax	2+12	Rht1	QAM165	SSD060040	CC	CC	NN	GG	AA	CC	AA	NN	TT	TT	CC	GG	CC	TT	TT	CC	GG	CC	CC	AA	CC	GG	CC	-0.05138	-0.447	0.3518	0.02436	1.0976	5.3207	-0.2688	CC	NN	GG	AA	CC	AA	NN	TT	NN	-0.767
WSU	lax	2+12	Rht1	QAM166	SSD060061	CC	CC	AA	GG	AA	TT	AA	AA	CC	TT	CC	GG	CC	TT	TT	CC	GG	TT	TT	GG	CC	GG	CC	-0.08119	-0.67	0.06562	0.01941	2.5387	-1.5577	0.5534	CC	AA	GG	AA	TT	AA	AA	CC	AA	-0.8702
WSU	lax	2+12	Rht1	QAM167	SSD060252	CC	CC	AA	AA	AA	CC	AA	GG	CC	TT	CC	GG	CC	TT	TT	CC	GG	CC	CC	GG	CC	GG	CC	0.05394	0.3405	0.6614	0.01192	1.2415	-1.6482	-0.9735	CC	AA	AA	AA	CC	AA	GG	CC	AA	-0.2383
WSU	lax	2+12	Rht1	QAM168	SSD060256	CC	CC	AA	AA	AA	NN	CC	GG	CC	TT	CC	GG	CC	TT	TT	CC	GG	CC	NN	GG	CC	GG	CC	-0.03159	0.5066	0.5536	0.02499	1.8626	1.5195	-1.0322	CC	AA	AA	AA	NN	CC	GG	CC	AA	-1.1603
WSU	lax	2+12	.	QAM169	SSD060298	CC	CC	AA	GG	AA	TT	CC	GG	TT	TT	CC	GG	CC	TT	TT	CC	GG	CC	TT	AA	CC	GG	CC	-0.01042	0.4978	0.0735	0.01732	3.1601	11.9276	-0.3862	CC	AA	GG	AA	TT	CC	GG	TT	AA	-1.1987
WSU	lax	2+12	Rht1	QAM170	SSD060530	CC	CC	GG	GG	GG	TT	AA	GG	TT	TT	CC	GG	TT	TT	CC	CC	GG	TT	TT	GG	CC	GG	CC	-0.118	-1.6034	-1.915	-0.01179	5.4399	33.3774	0.2597	CC	GG	GG	GG	TT	AA	GG	TT	GG	-1.5604
WSU	lax	2+12	Rht1	QAM171	SSD060535	CC	CC	GG	AA	GG	TT	CC	GG	TT	TT	CC	GG	TT	TT	TC	CC	GG	TT	TT	NN	CC	GG	CC	-0.1378	-2.5218	-1.845	-0.021	4.1119	18.625	1.1177	CC	GG	AA	GG	TT	CC	GG	TT	GG	-0.9989
USDA-ARS	lax	2+12	Rht1	QAM172	ARS010719-4L	CC	CC	GG	GG	AA	CC	CC	AA	TT	TT	CC	GG	CC	CC	TT	CC	GG	CC	CC	AA	CC	GG	CC	0.04846	3.7577	1.463	-0.00682	-1.0832	-1.7387	-1.502	CC	GG	GG	AA	CC	CC	AA	TT	AA	2.3123
USDA-ARS	club	5+10	Rht2	QAM173	ARS010746-2C	CC	CC	AA	GG	AA	CC	AA	AA	TT	TT	CC	GG	CC	CC	TT	CC	GG	TT	CC	GG	TC	GG	CC	0.02708	0.9593	0.8689	-0.00138	-0.1443	-15.3145	-0.7973	CC	AA	GG	AA	CC	AA	AA	TT	AA	1.1705
WSU	lax	2+12	Rht1	QAM174	V/W-29	CC	TT	AA	GG	GG	TT	AA	GG	TT	TT	TT	GG	TT	TT	CC	CC	GG	NN	TT	GG	CC	GG	TT	0.02608	-2.6416	-1.3492	0.01301	4.7846	27.223	0.3772	TT	AA	GG	GG	TT	AA	GG	TT	GG	-2.701
WSU	lax	2+12	Rht1	QAM175	V/W-30	CC	TT	AA	GG	GG	CC	AA	GG	TT	NN	TT	GG	TT	TT	CC	CC	GG	NN	CC	GG	CC	GG	TT	0.0184	-2.4958	-1.531	0.009214	3.1417	27.8566	1.1994	TT	AA	GG	GG	CC	AA	GG	TT	GG	-2.6097
WSU	lax	2+12	.	QAM176	V/W-32	CC	NN	AA	GG	GG	TT	CC	GG	TT	TT	NN	GG	TT	TT	CC	CC	GG	NN	TT	GG	CC	GG	NN	-0.09781	-1.8405	-1.3611	0.005713	2.7309	13.8282	0.08356	NN	AA	GG	GG	TT	CC	GG	TT	GG	-2.1727
WSU	lax	2+12	Rht1	QAM177	V/W-46	CC	TT	GG	GG	GG	TT	AA	GG	TT	TT	TT	GG	TT	TT	CC	CC	GG	CC	TT	GG	CC	GG	TT	-0.03297	-3.9717	-1.2423	0.000324	5.8995	16.9959	0.7296	TT	GG	GG	GG	TT	AA	GG	TT	GG	-1.4911
WSU	lax	2+12	.	QAM178	V/W-51	CC	TT	GG	GG	GG	TT	AA	GG	TT	TT	TT	GG	TT	TT	CC	CC	GG	CC	TT	GG	CC	GG	TT	-0.1527	-3.0945	-1.3798	-0.00665	4.7713	11.6561	0.847	TT	GG	GG	GG	TT	AA	GG	TT	GG	-1.1706
WSU	lax	2+12	Rht1	QAM179	V096408	CC	TT	AA	GG	GG	CC	CC	GG	TT	TT	TT	GG	TT	TT	CC	CC	GG	TT	CC	GG	CC	GG	TT	-0.1895	-0.7511	-1.0032	0.02864	3.0243	15.3668	-1.0322	TT	AA	GG	GG	CC	CC	GG	TT	GG	-3.3816
WSU	lax	2+12	Rht1	QAM180	VO95010	CC	CC	GG	GG	GG	TT	CC	GG	TT	TT	CC	GG	TT	TT	TT	CC	GG	TT	TT	GG	CC	GG	CC	0.1055	-0.4713	-1.3624	-0.01233	2.6136	20.6161	-1.1497	CC	GG	GG	GG	TT	CC	GG	TT	AA	-0.846
WSU	lax	2+12	Rht1	QAM181	VO96406	CC	NN	AA	GG	GG	CC	CC	GG	TT	TT	NN	GG	TT	TT	NN	CC	GG	TT	CC	GG	CC	GG	NN	-0.06067	-0.788	-1.1444	0.01534	2.2615	11.3846	-0.2101	NN	AA	GG	GG	CC	CC	GG	TT	GG	-2.5883
USDA-ARS	lax	2+12	Rht1	QAM182	ARS010704-1L	CC	CC	AA	GG	AA	CC	CC	AA	CC	TT	CC	GG	CC	CC	TT	CC	GG	CC	CC	GG	TT	GG	CC	0.1359	2.7262	1.1992	0.001613	-1.3766	-4.6348	-1.2671	CC	AA	GG	AA	CC	CC	AA	CC	AA	1.3286
USDA-ARS	lax	2+12	Rht1	QAM183	ARS960277L-R	CC	CC	AA	GG	AA	CC	CC	AA	CC	TT	CC	GG	CC	TT	TT	CC	GG	CC	CC	GG	CC	GG	CC	-0.01092	1.2685	-0.1477	0.03016	4.7846	11.3846	-0.3862	CC	AA	GG	AA	CC	CC	AA	CC	AA	-2.6165
WSU	lax	2+12	Rht1	QAM184	VO96410	CC	TT	AA	GG	GG	CC	CC	GG	TT	TT	TT	GG	TT	TT	CC	CC	GG	TT	CC	GG	CC	GG	TT	-0.09291	-0.01073	-0.5921	0.01982	1.8507	30.9338	-0.6799	TT	AA	GG	GG	CC	CC	GG	TT	GG	-2.2053
WSU	lax	2+12	Rht1	QAM185	VO96511	CC	TC	AA	GG	GG	CC	CC	GG	TT	TT	TC	GG	TT	TT	TC	CC	GG	TT	CC	GG	CC	GG	TC	-0.04779	-0.8064	-1.113	0.018	3.259	22.2452	-0.5037	TC	AA	GG	GG	CC	CC	GG	TT	GG	-2.7256
WSU	lax	2+12	Rht1	QAM186	WA8137	CC	CC	AA	GG	AA	CC	CC	AA	CC	TT	CC	GG	CC	TT	TT	CC	GG	CC	CC	GG	CC	GG	CC	0.04486	1.6775	0.7653	0.0178	2.0184	7.5834	0.5997	CC	AA	GG	AA	CC	CC	AA	CC	AA	-0.3076
WSU	lax	5+10	Rht1	QAM187	WA8138	CC	CC	GG	AA	GG	CC	CC	AA	TT	TT	CC	AA	TT	TT	TT	AA	GG	CC	CC	GG	CC	GG	CC	0.03961	2.164	0.9593	0.00786	0.6028	18.9871	-0.5473	CC	GG	AA	GG	CC	CC	AA	TT	AA	0.6164
USDA-ARS	club	2+12	Rht2	QAM188	2004X112-7-0-2	CC	CC	GG	GG	AA	CC	CC	AA	CC	TT	CC	GG	CC	CC	TT	CC	GG	CC	CC	AA	TT	GG	CC	0.08012	-0.6163	-0.3166	-0.00252	-1.1418	-19.3872	0.08356	CC	GG	GG	AA	CC	CC	AA	CC	AA	-0.1601
USDA-ARS	club	5+10	Rht2	QAM189	98X371-3C	CC	CC	AA	GG	AA	CC	AA	AA	TT	TT	CC	GG	CC	CC	TT	CC	GG	TT	CC	AA	CC	GG	CC	0.06707	0.721	1.1392	0.01014	-1.9159	2.0626	-1.2835	CC	AA	GG	AA	CC	AA	AA	TT	AA	0.6485
USDA-ARS	club	2+12	Rht2	QAM190	98X402-1C	CC	CC	GG	GG	GG	CC	CC	AA	TT	TT	CC	GG	CC	CC	TT	CC	GG	TT	CC	AA	CC	GG	CC	-0.09534	1.7825	-0.1585	0.000471	0.5618	-3.0962	0.7884	CC	GG	GG	GG	CC	CC	AA	TT	AA	-0.2815
USDA-ARS	club	H	Rht1	QAM191	98X471-2C	TT	CC	AA	GG	AA	CC	CC	GG	TT	TT	CC	GG	CC	CC	TT	CC	GG	TT	CC	AA	CC	GG	CC	-0.03033	-0.5762	-0.413	-0.0295	-0.8435	-7.531	0.3074	CC	AA	GG	AA	CC	CC	GG	TT	AA	1.5643
USDA-ARS	club	H	Rht2	QAM192	98X472-4C	CC	TT	AA	GG	AA	CC	CC	GG	TT	TT	TT	GG	CC	CC	TT	CC	GG	TT	CC	GG	CC	GG	TT	0.0085	-0.3118	-0.7926	-0.00132	-0.2148	-9.5221	-0.1736	TT	AA	GG	AA	CC	CC	GG	TT	AA	-0.9376
USDA-ARS	club	5+10	Rht2	QAM193	A00103	CC	CC	AA	GG	GG	CC	CC	AA	CC	TT	CC	GG	CC	CC	TT	CC	GG	TT	CC	GG	TT	GG	CC	0.1376	0.171	1.6186	0.01454	-2.8039	-7.712	-0.6767	CC	AA	GG	GG	CC	CC	AA	CC	AA	1.2845
USDA-ARS	club	H	Rht2	QAM194	A00122	CC	CC	GG	GG	AA	CC	AA	AA	CC	TT	CC	GG	CC	CC	TT	CC	GG	TT	CC	GG	TT	GG	CC	0.03612	0.511	0.06408	0.02241	-0.6724	-0.8336	-0.5037	CC	GG	GG	AA	CC	AA	AA	CC	GG	-1.4946
USDA-ARS	club	H	Rht2	QAM196	A00151	CC	TT	AA	GG	AA	CC	CC	AA	TT	TT	TT	GG	CC	CC	TT	CC	GG	TT	CC	GG	CC	GG	TT	0.01177	0.5783	-0.6283	-0.00701	0.5598	-18.3011	0.4359	TT	AA	GG	AA	CC	CC	AA	TT	GG	-0.2789
USDA-ARS	club	5+10	Rht2	QAM197	A00154	CC	CC	GG	GG	GG	CC	CC	AA	TT	TT	CC	GG	TT	CC	TT	CC	GG	CC	CC	AA	CC	GG	CC	0.05058	2.0469	-0.03787	-0.00779	3.3177	2.8771	1.0232	CC	GG	GG	GG	CC	CC	AA	TT	GG	0.5216
USDA-ARS	club	5+10	Rht2	QAM198	A00166	CC	CC	GG	GG	AA	CC	AA	AA	TT	TT	CC	GG	CC	NN	TT	CC	GG	TT	CC	AA	CC	GG	CC	0.03334	1.636	-0.6147	0.005185	0.8532	-1.5577	-0.09261	CC	GG	GG	AA	CC	AA	AA	TT	GG	-1.1123
USDA-ARS	club	2+12	Rht2	QAM199	A00181	CC	CC	GG	GG	AA	CC	AA	AA	TT	TT	CC	GG	CC	CC	TT	CC	GG	CC	CC	AA	CC	GG	CC	0.04363	0.8775	0.4361	-0.03774	-1.6978	-14.5904	-0.6376	CC	GG	GG	AA	CC	AA	AA	TT	AA	3.2511
USDA-ARS	club	5+10	Rht2	QAM200	A00187	CC	CC	GG	GG	AA	CC	AA	GG	CC	TT	CC	GG	CC	CC	TT	CC	GG	CC	CC	AA	TT	GG	CC	0.02794	0.6167	1.4342	0.0255	-0.8349	3.6011	-0.1771	CC	GG	GG	AA	CC	AA	GG	CC	GG	0.297
USDA-ARS	club	2+12	Rht2	QAM201	A00198	CC	CC	GG	GG	AA	CC	AA	GG	TT	TT	CC	GG	CC	CC	TT	CC	GG	TT	CC	AA	CC	GG	CC	0.1067	1.099	-0.3494	0.0217	0.9706	-18.2106	-0.6212	CC	GG	GG	AA	CC	AA	GG	TT	GG	-2.0291
USDA-ARS	club	5+10	Rht2	QAM203	A00212	CC	CC	AA	GG	GG	CC	AA	AA	TT	TT	CC	GG	NN	CC	TT	CC	GG	TT	CC	AA	CC	GG	CC	-0.0114	0.7647	-0.9177	0.008739	1.0292	-0.3811	0.7883	CC	AA	GG	GG	CC	AA	AA	TT	AA	-1.7483
USDA-ARS	club	2+12	Rht2	QAM204	A00228	CC	CC	AA	GG	AA	CC	AA	AA	CC	TT	CC	GG	CC	CC	TT	CC	GG	CC	CC	AA	TT	GG	CC	0.05134	0.3008	1.1762	-0.00647	-0.7311	-20.2923	-0.03389	CC	AA	GG	AA	CC	AA	AA	CC	AA	1.9248
USDA-ARS	club	2+12	Rht2	QAM205	A00229	CC	CC	GG	GG	AA	CC	CC	AA	CC	TT	CC	GG	CC	CC	TT	CC	GG	CC	CC	AA	TT	GG	CC	0.06949	1.3077	1.1573	0.014	-2.8765	-21.3783	-1.8219	CC	GG	GG	AA	CC	CC	AA	CC	GG	0.5117
USDA-ARS	club	2+12	Rht1	QAM206	A00248	CC	CC	GG	GG	AA	CC	AA	AA	CC	TT	CC	GG	CC	CC	TT	CC	GG	CC	CC	AA	TT	GG	CC	0.161	1.0946	0.8378	0.01286	-2.3741	-24.9985	-1.091	CC	GG	GG	AA	CC	AA	AA	CC	GG	0.1185
USDA-ARS	club	5+10	Rht2	QAM207	A99105	CC	NN	AA	GG	AA	CC	CC	AA	TT	TT	NN	GG	CC	TT	TT	CC	GG	TT	CC	AA	CC	GG	NN	-0.1446	0.1161	0.809	-0.01064	2.1818	24.5079	2.2992	NN	AA	GG	AA	CC	CC	AA	TT	AA	1.908
USDA-ARS	club	5+10	Rht2	QAM208	A99138	CC	CC	AA	GG	GG	CC	CC	AA	CC	TT	CC	GG	NN	CC	TT	CC	GG	TT	CC	AA	TT	GG	CC	-0.235	0.7982	-0.01923	-0.01157	1.2747	2.9676	1.1651	CC	AA	GG	GG	CC	CC	AA	CC	AA	0.9317
USDA-ARS	club	2+12	Rht1	QAM209	A99165	CC	CC	GG	GG	AA	CC	AA	AA	CC	TT	CC	GG	CC	TT	TT	CC	GG	CC	CC	NN	TT	GG	CC	0.1664	0.9824	2.9203	-0.01768	-4.1485	6.2258	-3.254	CC	GG	GG	AA	CC	AA	AA	CC	GG	4.9139
USDA-ARS	club	2+12	Rht2	QAM211	ARS00127	CC	CC	GG	GG	AA	CC	AA	AA	CC	TT	CC	GG	CC	NN	TT	CC	GG	CC	CC	AA	TT	GG	CC	0.1659	2.5026	1.1353	-0.01892	-4.8419	-19.1157	-1.1983	CC	GG	GG	AA	CC	AA	AA	CC	GG	2.6727
USDA-ARS	lax	2+12	Rht1	QAM212	ARS96105	CC	CC	GG	AA	AA	CC	CC	GG	TT	TT	CC	GG	TT	TT	CC	CC	GG	TT	CC	AA	CC	GG	CC	-0.00042	0.472	-0.2086	0.02144	1.3185	15.9099	-0.6864	CC	GG	AA	AA	CC	CC	GG	TT	GG	-1.7402
USDA-ARS	club	2+12	Rht2	QAM213	ARS97173-16	TT	CC	AA	GG	AA	CC	AA	AA	CC	TT	CC	GG	CC	CC	TT	CC	GG	CC	CC	GG	TT	GG	CC	0.06172	1.2573	0.8831	-0.00592	-1.4407	-23.0979	0.2442	CC	AA	GG	AA	CC	AA	AA	CC	GG	1.5478
USDA-ARS	club	H	Rht2	QAM214	ARS98237-28	CC	CC	GG	GG	AA	CC	AA	GG	CC	TT	CC	GG	CC	CC	CC	CC	GG	TT	CC	GG	TT	GG	CC	-0.0429	-1.4313	-0.4808	0.01038	-1.0245	-8.7076	-0.2688	CC	GG	GG	AA	CC	AA	GG	CC	GG	-1.3548
USDA-ARS	club	H	Rht1	QAM215	ARS99136	TT	CC	AA	GG	GG	CC	AA	GG	TT	TT	CC	GG	CC	TT	TC	CC	GG	NN	CC	AA	CC	GG	CC	-0.02126	0.4273	0.1918	-0.00571	-0.7896	.	0.2611	CC	AA	GG	GG	CC	AA	GG	TT	NN	0.8292
USDA-ARS	club	.	Rht2	QAM216	ARS99137	CC	CC	AA	GG	GG	CC	CC	AA	CC	TT	CC	GG	CC	TT	TT	CC	GG	TT	CC	AA	TT	GG	CC	-0.2371	1.3127	0.4069	-0.01157	3.1595	13.1947	2.231	CC	AA	GG	GG	CC	CC	AA	CC	AA	0.9351
USDA-ARS	club	.	Rht2	QAM217	C960003	TT	NN	GG	GG	NN	CC	AA	NN	CC	TT	NN	GG	NN	CC	TC	CC	GG	TT	CC	GG	NN	GG	NN	0.2015	0.5569	-0.1527	-0.01306	-3.1527	-26.1751	-1.658	NN	GG	GG	NN	CC	AA	NN	CC	GG	0.6567
USDA-ARS	club	2+12	Rht2	QAM218	C960097	CC	CC	AA	GG	AA	CC	AA	AA	CC	GG	CC	GG	CC	CC	TT	CC	GG	CC	CC	AA	TT	GG	CC	0.2709	2.5789	1.8017	-0.01568	0.3251	-17.0341	-1.6195	CC	AA	GG	AA	CC	AA	AA	CC	AA	3.3236
Oregon	lax	2+12	Rht1	QAM219	WEATHERFORD	CC	TC	GG	AA	AA	TT	AA	GG	TT	TT	TC	GG	CC	TT	TC	CC	GG	TT	TT	AA	CC	GG	TC	-0.2317	-2.1908	-0.6532	0.02806	1.6654	5.6828	1.7596	TC	GG	AA	AA	TT	AA	GG	TT	GG	-2.7743
USDA-ARS	lax	2+12	Rht1	QAM220	X00270-6L	CC	CC	GG	GG	AA	CC	AA	GG	TT	TT	CC	GG	CC	TT	TT	CC	GG	TT	CC	AA	CC	GG	CC	-0.03165	0.3855	-0.7252	-0.00587	0.5549	-9.6126	0.3139	CC	GG	GG	AA	CC	AA	GG	TT	AA	-0.5265
USDA-ARS	lax	2+12	Rht1	QAM221	X00277-4L	TT	CC	AA	GG	GG	TT	AA	GG	TT	TT	CC	GG	TT	TT	TT	CC	GG	TT	TT	AA	CC	GG	CC	-0.1985	-1.7005	-1.2982	-0.01007	1.2028	9.484	0.827	CC	AA	GG	GG	TT	AA	GG	TT	GG	-0.924
USDA-ARS	lax	2+12	.	QAM222	X00290-4L	CC	CC	GG	AA	GG	TT	CC	GG	TT	TT	CC	GG	TT	TT	TT	AA	GG	TT	TT	GG	CC	GG	CC	-0.2952	-1.1516	-2.0669	-0.00132	1.1164	20.7972	0.0484	CC	GG	AA	GG	TT	CC	GG	TT	GG	-2.5128
USDA-ARS	club	2+12	wildtype	QAM223	X00295-14C	CC	CC	GG	GG	AA	CC	AA	AA	CC	TT	CC	GG	TT	TT	CC	CC	GG	TT	CC	AA	TT	GG	CC	0.09404	3.7517	1.4236	0.009343	-1.2005	-5.5399	-2.5004	CC	GG	GG	AA	CC	AA	AA	CC	GG	0.9852
USDA-ARS	club	2+12	Rht2	QAM224	X010251-3C	CC	CC	GG	GG	AA	CC	CC	AA	TT	TT	CC	GG	CC	CC	TT	CC	GG	CC	CC	AA	CC	GG	CC	0.1592	3.1196	1.3783	-0.00964	-1.0405	-23.9125	-1.4371	CC	GG	GG	AA	CC	CC	AA	TT	AA	2.4258
USDA-ARS	club	2+12	Rht2	QAM225	X010251-4C	CC	CC	GG	GG	AA	CC	CC	AA	TT	TT	CC	GG	CC	CC	TT	CC	GG	CC	CC	AA	CC	GG	CC	0.2188	2.7133	1.4155	-0.02161	-0.4465	-23.2789	-2.3283	CC	GG	GG	AA	CC	CC	AA	TT	AA	3.614
USDA-ARS	club	2+12	Rht2	QAM226	X010251-5C	CC	CC	GG	GG	AA	CC	CC	AA	TT	TT	CC	GG	CC	CC	TT	CC	GG	CC	CC	AA	CC	GG	CC	0.1687	3.2983	0.8617	0.002007	-0.7062	-22.0119	-1.3416	CC	GG	GG	AA	CC	CC	AA	TT	AA	0.9752
USDA-ARS	club	2+12	Rht2	QAM227	X010251-7C	CC	CC	GG	GG	AA	CC	CC	AA	TT	TT	CC	GG	CC	CC	TT	CC	GG	CC	CC	AA	CC	GG	CC	0.1962	3.7516	1.4527	-0.00299	-0.8245	-19.4777	-1.4371	CC	GG	GG	AA	CC	CC	AA	TT	AA	2.0477
USDA-ARS	club	2+12	Rht2	QAM228	X010253-4C	CC	CC	GG	GG	AA	CC	CC	AA	TT	TT	CC	GG	CC	CC	TT	CC	GG	CC	CC	AA	CC	GG	CC	0.1592	2.4199	1.7875	-0.01097	-0.3926	-18.4822	-1.4641	CC	GG	GG	AA	CC	CC	AA	TT	AA	2.9119
USDA-ARS	club	2+12	Rht2	QAM229	X010259-2C	CC	CC	GG	GG	GG	CC	AA	AA	TT	TT	CC	GG	TT	CC	TT	CC	GG	TT	CC	GG	NN	GG	CC	0.09156	-0.1531	0.5599	-0.00698	-1.8773	-8.6171	-0.3298	CC	GG	GG	GG	CC	AA	AA	TT	GG	0.9495
USDA-ARS	club	.	Rht1	QAM230	X010260-6C	CC	CC	GG	GG	AA	CC	AA	AA	CC	TT	CC	GG	CC	CC	TT	CC	GG	CC	CC	NN	TT	GG	CC	0.1761	0.4316	0.816	0.004766	-4.388	-8.4361	-1.9502	CC	GG	GG	AA	CC	AA	AA	CC	GG	1.3881
USDA-ARS	club	5+10	Rht2	QAM231	X010262-1C	CC	CC	GG	GG	AA	CC	AA	AA	CC	TT	CC	GG	CC	CC	TT	CC	GG	TT	CC	GG	TT	GG	CC	0.106	0.9528	1.3225	-0.00831	-2.4983	-3.7298	-0.7349	CC	GG	GG	AA	CC	AA	AA	CC	GG	2.1197
USDA-ARS	club	5+10	Rht2	QAM232	X010262-5C	CC	CC	GG	GG	AA	CC	AA	AA	CC	TT	CC	GG	CC	CC	TT	CC	GG	TT	CC	GG	TT	GG	CC	0.04808	-0.08543	0.3739	-0.00033	-0.5815	-2.5532	-0.3839	CC	GG	GG	AA	CC	AA	AA	CC	GG	0.3734
USDA-ARS	club	2+12	Rht2	QAM233	X010263-3C	CC	CC	GG	GG	AA	CC	AA	GG	CC	TT	CC	GG	CC	CC	TT	CC	GG	TT	CC	GG	TT	GG	CC	0.0764	-0.8439	-0.07255	0.006579	-3.0382	-16.129	-1.4371	CC	GG	GG	AA	CC	AA	GG	CC	GG	-0.9189
USDA-ARS	club	2+12	Rht2	QAM234	X010264-1C	CC	CC	GG	GG	AA	CC	AA	AA	CC	TT	CC	GG	CC	CC	TT	CC	GG	CC	CC	AA	TT	GG	CC	0.15	-0.7616	0.816	-0.00973	-2.2283	-12.9613	-0.789	CC	GG	GG	AA	CC	AA	AA	CC	AA	1.9508
USDA-ARS	club	2+12	Rht2	QAM235	X010283-3C	CC	CC	AA	GG	GG	CC	CC	AA	CC	TT	CC	GG	TT	CC	TT	CC	GG	TT	CC	AA	TT	GG	CC	0.1399	-1.0812	-0.365	-0.00698	-0.3386	-12.5993	0.2643	CC	AA	GG	GG	CC	CC	AA	CC	AA	-0.7616
USDA-ARS	club	2+12	Rht2	QAM236	X010283-5C	CC	CC	GG	GG	GG	CC	CC	AA	CC	TT	CC	GG	TT	CC	TT	CC	GG	TT	CC	AA	NN	GG	CC	0.2426	-0.021	0.194	-0.00611	-0.5545	-13.4139	-0.7079	CC	GG	GG	GG	CC	CC	AA	CC	GG	1.9226
USDA-ARS	club	.	Rht2	QAM237	X010290-2C	CC	CC	GG	AA	AA	CC	AA	AA	TT	TT	CC	GG	CC	CC	TT	CC	GG	TT	CC	AA	CC	GG	CC	-0.04208	-1.3268	0.3925	0.001004	1.8679	-9.2506	2.325	CC	GG	AA	AA	CC	AA	AA	TT	AA	0.6074
USDA-ARS	club	.	Rht2	QAM238	X010290-8C	CC	CC	AA	AA	AA	CC	CC	AA	TT	TT	CC	GG	CC	CC	TT	CC	GG	TT	CC	AA	CC	GG	CC	0.02486	-2.124	-0.3408	-0.01359	1.5461	-6.0829	1.5317	CC	AA	AA	AA	CC	CC	AA	TT	AA	0.8217
USDA-ARS	club	.	Rht2	QAM239	X010291-4C	CC	CC	GG	AA	AA	CC	CC	AA	TT	TT	CC	GG	CC	CC	TT	CC	GG	TT	CC	AA	CC	GG	CC	0.04597	1.7821	0.1619	-0.00439	2.609	-9.7936	0.4686	CC	GG	AA	AA	CC	CC	AA	TT	AA	0.2948
USDA-ARS	club	2+12	Rht2	QAM240	X010293-6C	CC	CC	GG	AA	GG	CC	CC	AA	TT	TT	CC	GG	TT	CC	TC	CC	GG	TT	CC	AA	CC	GG	CC	0.01335	-0.6665	-0.5693	0.004818	1.206	-0.5621	0.7025	CC	GG	AA	GG	CC	CC	AA	TT	AA	-0.7152
USDA-ARS	club	2+12	Rht2	QAM241	X010298-5C	CC	CC	GG	GG	AA	CC	AA	AA	CC	TT	CC	GG	CC	CC	TT	CC	GG	TT	CC	AA	CC	GG	CC	-0.06784	-1.0334	-0.01671	0.002334	0.2254	-18.3916	0.5074	CC	GG	GG	AA	CC	AA	AA	CC	GG	-0.1127
USDA-ARS	club	2+12	Rht2	QAM242	X010300-2C	CC	CC	GG	GG	AA	CC	AA	AA	TT	TT	CC	GG	CC	CC	TT	CC	GG	TT	CC	AA	CC	GG	CC	0.03841	-0.309	0.7271	-0.0043	-1.4184	-15.948	-0.3028	CC	GG	GG	AA	CC	AA	AA	TT	GG	1.8101
USDA-ARS	club	2+12	Rht2	QAM243	X010302-1C	CC	TT	GG	GG	AA	CC	CC	AA	CC	TT	TT	GG	CC	NN	TT	CC	GG	TT	CC	AA	CC	GG	TT	0.03829	-1.8616	0.3447	0.000215	0.5896	-14.0474	0.1709	TT	GG	GG	AA	CC	CC	AA	CC	GG	0.7998
USDA-ARS	club	5+10	Rht2	QAM244	X010302-2C	CC	CC	GG	GG	AA	CC	CC	GG	CC	TT	CC	GG	CC	NN	TT	CC	GG	TT	CC	AA	TT	GG	CC	0.06902	0.208	0.3739	0.004994	-2.0123	-7.531	-0.05978	CC	GG	GG	AA	CC	CC	GG	CC	GG	0.4814
USDA-ARS	club	2+12	Rht2	QAM245	X010302-5C	CC	CC	GG	GG	AA	CC	AA	AA	CC	TT	CC	GG	CC	NN	TT	CC	GG	TT	CC	AA	CC	GG	CC	0.07063	0.6368	0.7645	0.01032	-0.3116	-16.9436	-0.2758	CC	GG	GG	AA	CC	AA	AA	CC	GG	0.6074
USDA-ARS	club	2+12	Rht2	QAM246	X010455-2C	CC	CC	GG	GG	AA	CC	AA	AA	TT	TT	CC	GG	CC	CC	TT	CC	GG	TT	CC	GG	CC	GG	CC	0.1287	0.3081	0.3717	-0.00973	-1.9853	-22.4644	-0.6809	CC	GG	GG	AA	CC	AA	AA	TT	GG	0.6847
USDA-ARS	club	2+12	Rht1	QAM247	X010463-4C	CC	CC	GG	AA	GG	CC	CC	GG	CC	TT	CC	GG	TT	CC	TT	CC	GG	CC	CC	AA	TT	GG	CC	0.283	1.9127	0.816	0.006579	-3.1732	-16.0385	-2.3013	CC	GG	AA	GG	CC	CC	GG	CC	GG	0.4878
USDA-ARS	club	2+12	Rht1	QAM248	X010463-9C	CC	CC	GG	AA	AA	CC	CC	GG	CC	TT	CC	GG	CC	CC	TT	CC	GG	TT	CC	AA	TT	GG	CC	0.1524	0.06129	-0.3391	0.0102	-0.9865	-12.5088	-1.2751	CC	GG	AA	AA	CC	CC	GG	CC	GG	-1.2565
USDA-ARS	club	5+10	Rht2	QAM249	X010662-2C	CC	CC	GG	GG	GG	CC	CC	AA	TT	TT	CC	GG	CC	CC	TT	CC	GG	CC	CC	AA	TC	GG	CC	-0.1033	-0.582	1.4713	0.003664	2.2886	7.7644	2.5705	CC	GG	GG	GG	CC	CC	AA	TT	GG	1.6156
USDA-ARS	club	2+12	Rht2	QAM250	X010669-2C	CC	CC	GG	GG	AA	CC	CC	AA	CC	TT	CC	GG	CC	CC	TT	CC	GG	CC	CC	AA	TT	GG	CC	0.1398	0.2014	-0.02221	-0.00609	-1.1499	-24.2745	-1.0826	CC	GG	GG	AA	CC	CC	AA	CC	GG	0.3801
USDA-ARS	lax	2+12	Rht1	QAM251	X010678-8C	CC	CC	GG	AA	AA	CC	AA	GG	TT	TT	CC	GG	CC	TT	CC	CC	GG	TT	CC	AA	CC	GG	CC	-0.0614	-2.5908	-0.6863	-0.00964	-0.1226	7.4929	0.7234	CC	GG	AA	AA	CC	AA	GG	TT	AA	-0.2568
USDA-ARS	club	5+10	Rht2	QAM252	X010679-1C	TT	CC	AA	GG	AA	CC	AA	AA	CC	TT	CC	GG	CC	CC	TT	CC	GG	CC	CC	GG	TT	GG	CC	0.169	2.4476	1.0825	-0.01698	-2.5523	-15.405	-1.8152	CC	AA	GG	AA	CC	AA	AA	CC	AA	1.8945
USDA-ARS	club	5+10	Rht2	QAM253	X010679-3C	CC	CC	AA	GG	GG	CC	AA	AA	CC	TT	CC	GG	TT	CC	TT	CC	GG	CC	CC	GG	TT	GG	CC	0.0859	0.267	0.9344	-0.0043	-2.8222	-6.8975	-2.5984	CC	AA	GG	GG	CC	AA	AA	CC	AA	0.9942
USDA-ARS	club	2+12	Rht1	QAM254	X010704-3C	CC	CC	AA	GG	AA	CC	AA	AA	CC	TT	CC	GG	CC	CC	TT	CC	GG	TT	CC	GG	CC	GG	CC	0.06393	-0.8619	0.09226	-0.00899	-1.1687	-10.7892	0.3032	CC	AA	GG	AA	CC	AA	AA	CC	AA	0.7665
USDA-ARS	club	2+12	Rht1	QAM255	X010726-2C	CC	CC	GG	AA	AA	CC	CC	GG	CC	TT	CC	GG	CC	TT	TT	CC	GG	TT	CC	GG	CC	GG	CC	-0.09932	-4.0893	-0.1212	0.01973	1.3459	-1.1051	0.5621	CC	GG	AA	AA	CC	CC	GG	CC	GG	-1.5742
USDA-ARS	lax	2+12	Rht1	QAM256	X010729-1L	CC	CC	AA	GG	AA	CC	CC	AA	CC	TT	CC	GG	CC	TT	TT	CC	GG	NN	CC	AA	CC	GG	CC	0.1669	2.9423	1.0964	-0.00253	3.083	5.2302	0.5534	CC	AA	GG	AA	CC	CC	AA	CC	AA	1.5599
USDA-ARS	lax	2+12	Rht1	QAM257	X010730-6L	CC	CC	AA	AA	AA	CC	CC	AA	CC	TT	CC	GG	CC	TT	TT	CC	GG	CC	CC	GG	CC	GG	CC	-0.06814	1.0088	0.8925	-0.0185	1.0292	3.0581	0.6121	CC	AA	AA	AA	CC	CC	AA	CC	AA	2.46
USDA-ARS	club	5+10	Rht2	QAM258	X010741-3C	CC	CC	AA	GG	AA	CC	AA	AA	CC	TT	CC	GG	CC	CC	TT	CC	GG	CC	CC	GG	TT	GG	CC	0.02754	-0.5106	0.3722	-0.0005	-3.0546	-20.8353	-1.6948	CC	AA	GG	AA	CC	AA	AA	CC	AA	0.5108
USDA-ARS	club	H	Rht2	QAM259	X010742-2C	CC	CC	AA	GG	AA	CC	CC	AA	CC	TT	CC	GG	CC	CC	TT	CC	GG	CC	CC	GG	TC	GG	CC	0.1653	2.0031	1.2846	-0.0012	-1.5526	-22.5549	-1.3259	CC	AA	GG	AA	CC	CC	AA	CC	NN	1.7125
USDA-ARS	club	2+12	Rht2	QAM260	X010744-3C	CC	CC	AA	GG	AA	CC	AA	AA	CC	TT	CC	GG	CC	CC	TT	CC	GG	TT	CC	GG	TT	GG	CC	0.204	1.3218	1.4257	-0.00386	-0.8485	-26.9897	-1.2671	CC	AA	GG	AA	CC	AA	AA	CC	AA	2.0786
USDA-ARS	club	2+12	Rht2	QAM261	X010746-4C	CC	CC	AA	GG	AA	CC	AA	AA	CC	TT	CC	GG	CC	CC	TT	CC	GG	CC	CC	AA	TT	GG	CC	0.0852	2.2393	1.6201	-0.01847	-2.9609	-24.184	-2.4417	CC	AA	GG	AA	CC	AA	AA	CC	AA	3.38
USDA-ARS	club	5+10	.	QAM262	X010746-5C	CC	CC	AA	GG	AA	CC	AA	AA	CC	TT	CC	GG	CC	CC	TT	CC	GG	CC	CC	GG	TT	GG	CC	0.1363	1.5428	0.9082	-0.01317	-1.0832	-11.8753	0.3772	CC	AA	GG	AA	CC	AA	AA	CC	AA	2.1091
USDA-ARS	club	2+12	Rht2	QAM263	X010746-8C	CC	CC	AA	GG	AA	CC	AA	AA	CC	TT	CC	GG	CC	CC	TT	CC	GG	CC	CC	GG	TT	GG	CC	0.05423	0.8615	1.8648	0.006779	-3.3129	-23.9125	-0.7386	CC	AA	GG	AA	CC	AA	AA	CC	AA	1.8498
USDA-ARS	club	2+12	Rht2	QAM264	X010780-5C	CC	CC	GG	GG	AA	CC	AA	AA	CC	TT	CC	GG	CC	CC	TT	NN	GG	CC	CC	AA	TT	GG	CC	0.06254	1.2686	0.3769	-0.01251	-1.0323	-20.5638	-0.4994	CC	GG	GG	AA	CC	AA	AA	CC	AA	1.3622
USDA-ARS	club	2+12	Rht2	QAM265	X010782-3C	CC	CC	GG	AA	AA	CC	CC	AA	CC	TT	CC	GG	CC	CC	TT	CC	GG	CC	CC	AA	TT	GG	CC	-0.0601	-1.6648	0.3988	-0.00252	1.4756	-23.822	1.6923	CC	GG	AA	AA	CC	CC	AA	CC	AA	0.4272
USDA-ARS	club	H	Rht2	QAM266	X010787-1C	CC	NN	AA	GG	AA	CC	AA	AA	TT	TT	NN	GG	TT	NN	TT	AA	GG	TT	CC	AA	CC	GG	NN	-0.03225	2.8708	0.5713	-0.01073	0.2905	35.097	2.0933	NN	AA	GG	AA	CC	AA	AA	TT	AA	1.5153
USDA-ARS	lax	2+12	Rht1	QAM267	X010817-4L	CC	CC	AA	AA	AA	CC	AA	GG	CC	TT	CC	GG	CC	CC	CC	CC	GG	CC	CC	GG	TT	GG	CC	0.1333	1.6418	0.499	-0.02777	-1.3293	-3.2773	-2.2548	CC	AA	AA	AA	CC	AA	GG	CC	AA	2.633
USDA-ARS	club	2+12	.	QAM268	X010830-2C	CC	CC	GG	AA	AA	CC	AA	NN	CC	TT	CC	GG	CC	CC	CC	CC	GG	TT	CC	GG	TT	GG	CC	0.05283	-0.08434	-0.04331	0.001578	1.1274	-5.4494	0.4459	CC	GG	AA	AA	CC	AA	NN	CC	AA	-0.1336
USDA-ARS	club	2+12	Rht2	QAM269	X950424-1	CC	CC	GG	GG	AA	CC	CC	AA	TT	TT	CC	GG	CC	CC	TT	CC	GG	CC	CC	AA	CC	GG	CC	0.01645	0.5964	0.4164	-0.00594	-1.1418	-18.5727	-0.6799	CC	GG	GG	AA	CC	CC	AA	TT	AA	0.9509
USDA-ARS	club	2+12	Rht2	QAM270	X950424-2	CC	CC	GG	GG	AA	CC	CC	AA	CC	TT	CC	GG	CC	CC	TT	CC	GG	CC	CC	AA	TT	GG	CC	-0.01527	0.4192	1.1139	-0.00663	-3.4109	-22.0119	-2.2421	CC	GG	GG	AA	CC	CC	AA	CC	AA	1.8361
USDA-ARS	lax	2+12	Rht1	QAM271	X950851	CC	CC	AA	AA	AA	CC	CC	AA	TT	TT	CC	GG	CC	TT	TT	CC	GG	TT	CC	GG	CC	GG	CC	-0.1513	-1.6786	0.3118	-0.00712	1.4987	9.5745	1.493	CC	AA	AA	AA	CC	CC	AA	TT	AA	0.9411
USDA-ARS	club	H	Rht2	QAM272	X960011C	CC	TC	AA	GG	AA	CC	CC	AA	CC	TT	TC	GG	CC	CC	TT	CC	GG	TT	CC	GG	TC	GG	TC	0.2257	3.0711	0.9791	0.01131	-1.4939	-10.6987	-1.502	TC	AA	GG	AA	CC	CC	AA	CC	AA	0.2523
USDA-ARS	club	H	Rht2	QAM273	X9602044-2C	CC	NN	AA	GG	GG	CC	CC	AA	TT	TT	NN	GG	CC	TT	TT	CC	GG	TT	CC	AA	CC	GG	NN	-0.04104	0.1396	-0.5388	-0.01627	2.8174	1.067	1.2011	NN	AA	GG	GG	CC	CC	AA	TT	AA	0.4397
USDA-ARS	club	2+12	Rht2	QAM274	X960407	CC	CC	GG	GG	AA	CC	NN	AA	CC	TT	CC	GG	CC	CC	TT	CC	GG	CC	CC	AA	TT	GG	CC	0.03337	1.1087	1.021	0.001472	-1.7049	-18.0296	0.0407	CC	GG	GG	AA	CC	NN	AA	CC	GG	1.17
USDA-ARS	club	H	Rht2	QAM275	X960409-1	CC	CC	AA	GG	AA	CC	AA	AA	CC	TT	CC	GG	CC	CC	TT	CC	GG	CC	CC	GG	NN	GG	CC	0.1529	1.0955	0.3348	-0.01081	-3.5476	-24.003	-1.7369	CC	AA	GG	AA	CC	AA	AA	CC	AA	1.2825
USDA-ARS	club	2+12	Rht2	QAM276	X960411-1	CC	CC	GG	GG	AA	CC	AA	AA	TT	TT	CC	GG	CC	CC	TT	CC	GG	CC	CC	AA	CC	GG	CC	-0.01425	0.8723	0.7857	-0.00712	-2.2567	-18.9347	-0.9148	CC	GG	GG	AA	CC	AA	AA	TT	AA	1.5319
USDA-ARS	club	2+12	Rht2	QAM277	X960411-2	CC	CC	GG	GG	AA	CC	CC	NN	TT	TT	CC	GG	CC	CC	TT	CC	GG	TT	CC	AA	TC	GG	CC	-0.01677	0.02393	-0.3429	-0.03638	-2.4914	-10.4272	-0.03389	CC	GG	GG	AA	CC	CC	NN	TT	AA	2.2701
USDA-ARS	club	2+12	Rht2	QAM278	X960414-1	CC	CC	GG	GG	AA	CC	AA	AA	TT	TT	CC	GG	CC	CC	TT	CC	GG	CC	CC	AA	CC	GG	CC	-0.00563	1.1643	0.8044	-0.03093	-1.1623	-18.2106	-0.2714	CC	GG	GG	AA	CC	AA	AA	TT	AA	3.1659
USDA-ARS	club	2+12	Rht2	QAM279	X960414-2	CC	CC	GG	GG	AA	CC	AA	AA	TT	TT	CC	GG	CC	CC	TT	CC	GG	CC	CC	AA	CC	GG	CC	-0.1009	1.5401	0.9971	-0.01241	-1.1353	-17.5771	-0.1363	CC	GG	GG	AA	CC	AA	AA	TT	AA	2.1489
USDA-ARS	club	2+12	Rht2	QAM280	X960418	CC	CC	GG	GG	AA	CC	AA	AA	TT	TT	CC	GG	CC	CC	TT	CC	GG	CC	CC	AA	CC	GG	CC	-0.129	1.2651	1.0785	-0.02761	-1.9193	-18.0296	-0.5903	CC	GG	GG	AA	CC	AA	AA	TT	AA	3.1822
USDA-ARS	club	2+12	Rht2	QAM281	X960427	CC	CC	GG	GG	AA	CC	CC	AA	CC	TT	CC	GG	CC	CC	TT	CC	GG	TT	CC	AA	TT	GG	CC	0.04285	0.3843	0.9021	-0.00479	-2.383	-17.7581	-1.2217	CC	GG	GG	AA	CC	CC	AA	CC	AA	1.4944
USDA-ARS	club	2+12	Rht2	QAM282	X960491	CC	CC	AA	GG	AA	CC	AA	AA	TT	TT	CC	GG	CC	CC	NN	CC	GG	TT	CC	AA	TC	GG	CC	-0.02027	0.9118	0.2447	-0.01551	-0.4496	-15.586	-0.1143	CC	AA	GG	AA	CC	AA	AA	TT	AA	1.3794
USDA-ARS	club	2+12	Rht2	QAM283	X960499	CC	CC	GG	GG	AA	CC	AA	AA	TT	TT	CC	GG	CC	CC	TT	CC	GG	CC	CC	NN	NN	GG	CC	0.06011	1.7605	0.767	0.009118	-2.1012	-10.9702	0.1431	CC	GG	GG	AA	CC	AA	AA	TT	AA	0.2842
USDA-ARS	club	2+12	Rht2	QAM284	X960503	CC	CC	GG	GG	AA	CC	CC	AA	NN	TT	CC	GG	CC	NN	TT	CC	GG	CC	CC	NN	TC	GG	CC	-0.07151	-0.04973	-0.7507	0.01283	-0.9658	-18.4822	-0.7386	CC	GG	GG	AA	CC	CC	AA	NN	AA	-1.834
USDA-ARS	club	2+12	Rht2	QAM286	X960538C	CC	CC	GG	GG	AA	CC	CC	AA	NN	TT	CC	GG	CC	CC	TT	CC	GG	CC	CC	AA	TC	GG	CC	0.1868	2.0883	0.6611	-0.00427	-2.1394	-22.6454	-1.3846	CC	GG	GG	AA	CC	CC	AA	NN	GG	1.0692
USDA-ARS	club	2+12	Rht2	QAM289	X960731	CC	CC	GG	GG	AA	CC	CC	AA	TT	TT	CC	GG	CC	CC	TT	CC	GG	TT	CC	AA	CC	GG	CC	0.1887	2.8801	0.6325	0.006359	-0.9071	-17.2151	-0.5037	CC	GG	GG	AA	CC	CC	AA	TT	GG	0.3438
USDA-ARS	club	2+12	Rht2	QAM290	X960749-1	CC	CC	GG	GG	AA	CC	AA	AA	CC	TT	CC	GG	CC	CC	TT	CC	GG	CC	CC	AA	TT	GG	CC	0.1263	1.9429	0.6157	-0.00829	-1.2761	-19.9302	-0.6546	CC	GG	GG	AA	CC	AA	AA	CC	NN	1.3133
USDA-ARS	club	2+12	Rht2	QAM291	X960749-2	CC	CC	GG	GG	AA	CC	AA	AA	CC	TT	CC	GG	CC	CC	TT	CC	GG	CC	CC	AA	TT	GG	CC	0.1151	2.3699	0.5113	0.01322	-1.7286	-17.6676	-0.6212	CC	GG	GG	AA	CC	AA	AA	CC	AA	-0.2733
USDA-ARS	club	5+10	Rht2	QAM292	X96312t313C	CC	CC	AA	GG	AA	CC	AA	AA	CC	TT	CC	GG	CC	CC	TT	CC	GG	CC	CC	AA	TT	GG	CC	-0.0013	0.7818	0.9458	-0.01389	-3.4303	-3.5488	-0.9735	CC	AA	GG	AA	CC	AA	AA	CC	AA	2.3454
USDA-ARS	club	2+12	Rht2	QAM293	X970005-1	CC	CC	AA	GG	AA	CC	AA	AA	CC	TT	CC	GG	CC	NN	TT	CC	GG	CC	CC	GG	TT	GG	CC	0.1437	2.9248	2.6795	-0.00091	-4.6566	-25.9036	-2.4911	CC	AA	GG	AA	CC	AA	AA	CC	AA	3.3162
USDA-ARS	club	2+12	Rht2	QAM294	X970005-2	CC	CC	AA	GG	AA	CC	AA	AA	TT	TT	CC	GG	CC	CC	TT	CC	GG	CC	CC	GG	CC	GG	CC	0.2063	2.821	1.0774	0.002796	-1.6805	-23.0074	-1.5555	CC	AA	GG	AA	CC	AA	AA	TT	AA	1.083
USDA-ARS	club	2+12	Rht2	QAM295	X970008-2	CC	CC	AA	GG	AA	CC	AA	AA	CC	TT	CC	GG	CC	CC	TT	CC	GG	CC	CC	AA	TT	GG	CC	0.02092	1.9384	1.0987	-0.01815	-1.6837	-19.3872	0.02817	CC	AA	GG	AA	CC	AA	AA	CC	AA	2.631
USDA-ARS	club	2+12	Rht2	QAM296	X970008-3	CC	CC	GG	GG	AA	CC	AA	AA	TT	TT	CC	GG	CC	CC	TT	CC	GG	CC	CC	AA	CC	GG	CC	-0.05478	0.2374	0.1633	-0.01429	-0.5228	-19.1157	1.3785	CC	GG	GG	AA	CC	AA	AA	TT	AA	1.2413
USDA-ARS	club	2+12	Rht2	QAM297	X970012-3C	CC	CC	GG	GG	AA	CC	CC	AA	TT	TT	CC	GG	CC	CC	TT	CC	GG	CC	CC	AA	CC	GG	CC	0.129	3.444	0.878	-0.00309	-0.6647	-0.8336	-0.1237	CC	GG	GG	AA	CC	CC	AA	TT	AA	1.249
USDA-ARS	club	2+12	Rht2	QAM298	X970024-4	TT	CC	AA	GG	AA	CC	AA	AA	CC	TT	CC	GG	TT	CC	TT	CC	GG	CC	CC	GG	TT	GG	CC	0.1027	2.9488	0.8617	-0.00536	-2.7848	-23.2789	-2.0893	CC	AA	GG	AA	CC	AA	AA	CC	GG	1.4841
USDA-ARS	club	2+12	Rht2	QAM299	X970026-1	CC	TC	AA	GG	AA	CC	AA	AA	CC	TT	TC	GG	TT	CC	NN	CC	GG	CC	CC	GG	NN	GG	TC	0.2183	1.5656	0.7766	-0.01195	-3.8319	-26.1751	-2.1804	TC	AA	GG	AA	CC	AA	AA	CC	AA	1.7594
USDA-ARS	club	2+12	Rht2	QAM300	X970027-1	TT	TT	AA	GG	AA	TT	AA	AA	CC	TT	TT	GG	CC	CC	TT	CC	GG	CC	TT	GG	TT	GG	TT	0.1086	1.7229	0.4031	-0.00137	-2.9937	-19.9302	-1.642	TT	AA	GG	AA	TT	AA	AA	CC	GG	0.5635
USDA-ARS	club	2+12	Rht2	QAM301	X970027-2	CC	CC	AA	GG	AA	NN	AA	AA	CC	TT	CC	GG	CC	CC	TT	CC	GG	CC	NN	GG	TT	GG	CC	0.0772	2.2254	1.077	-0.00766	-3.415	-23.822	-1.9495	CC	AA	GG	AA	NN	AA	AA	CC	NN	1.8714
USDA-ARS	club	2+12	Rht2	QAM302	X970038-1C	TT	CC	GG	GG	AA	CC	AA	AA	CC	TT	CC	GG	CC	CC	TT	CC	GG	CC	CC	GG	TT	GG	CC	0.1362	3.0428	1.8135	0.002707	-2.9022	-19.5682	-2.2655	CC	GG	GG	AA	CC	AA	AA	CC	AA	1.9916
USDA-ARS	club	2+12	Rht2	QAM303	X970038-2C	TT	CC	GG	GG	AA	CC	AA	AA	CC	TT	CC	GG	CC	NN	TT	CC	GG	CC	CC	GG	TT	GG	CC	0.186	4.1125	2.702	-0.00393	-3.1956	-24.003	-1.6782	CC	GG	GG	AA	CC	AA	AA	CC	AA	3.5952
USDA-ARS	club	2+12	Rht2	QAM304	X970042-2C	CC	CC	AA	GG	AA	CC	AA	AA	CC	TT	CC	GG	CC	CC	TT	CC	GG	TT	CC	AA	TT	GG	CC	0.1954	6.2108	2.1985	0.00492	-0.8485	-21.1068	-2.794	CC	AA	GG	AA	CC	AA	AA	CC	AA	2.2448
USDA-ARS	club	2+12	Rht2	QAM305	X970042C	CC	CC	AA	GG	AA	CC	AA	AA	CC	TT	CC	GG	CC	CC	TT	CC	GG	TT	CC	AA	TT	GG	CC	0.1393	5.2234	2.2873	0.002707	-2.4328	-23.5505	-2.7353	CC	AA	GG	AA	CC	AA	AA	CC	AA	2.5261
USDA-ARS	club	2+12	Rht2	QAM306	X970048-1C	CC	CC	GG	GG	AA	CC	AA	AA	CC	TT	CC	GG	CC	CC	TT	CC	GG	TT	CC	GG	TT	GG	CC	0.07139	1.3179	0.5012	-0.00329	-0.5551	-24.4555	-0.445	CC	GG	GG	AA	CC	AA	AA	CC	AA	0.8485
USDA-ARS	club	2+12	Rht2	QAM307	X970048-2C	CC	CC	GG	GG	AA	CC	AA	AA	CC	TT	CC	GG	CC	CC	TT	CC	GG	TT	CC	GG	TT	GG	CC	0.003023	2.1693	1.5786	-0.00997	-0.9071	-22.7359	-0.9735	CC	GG	GG	AA	CC	AA	AA	CC	AA	2.6837
USDA-ARS	club	2+12	Rht2	QAM308	X970048C	CC	CC	GG	GG	AA	CC	AA	AA	CC	TT	CC	GG	CC	CC	TT	CC	GG	TT	CC	GG	TT	GG	CC	0.03436	1.3547	0.3287	0.000703	0.0904	-22.7359	-0.7386	CC	GG	GG	AA	CC	AA	AA	CC	AA	0.345
USDA-ARS	club	H	Rht2	QAM309	X970054-2	CC	CC	AA	GG	NN	CC	AA	AA	CC	TT	CC	GG	CC	CC	TT	CC	GG	CC	CC	GG	TT	GG	CC	0.2551	3.1303	2.5096	-0.00417	-4.5414	-23.3694	-3.2071	CC	AA	GG	NN	CC	AA	AA	CC	AA	3.4045
USDA-ARS	club	2+12	Rht2	QAM310	X970055-2	CC	CC	GG	GG	AA	CC	AA	AA	CC	TT	CC	GG	CC	CC	TT	CC	GG	CC	CC	GG	TT	GG	CC	0.1921	2.8853	1.6653	-0.01237	-6.7748	-27.2612	-2.5012	CC	GG	GG	AA	CC	AA	AA	CC	GG	2.9503
USDA-ARS	club	2+12	Rht2	QAM311	X970057-2	CC	CC	GG	GG	AA	CC	AA	AA	CC	TT	CC	GG	CC	CC	TT	CC	GG	CC	CC	GG	TT	GG	CC	0.02281	3.1054	2.0099	-0.00244	-2.7434	-22.4644	-2.0233	CC	GG	GG	AA	CC	AA	AA	CC	AA	2.596
USDA-ARS	club	2+12	Rht2	QAM312	X970057-4	TT	CC	GG	GG	AA	CC	AA	AA	TT	TT	CC	GG	CC	CC	TT	CC	GG	CC	CC	NN	TC	GG	CC	0.1346	3.4616	1.9493	-0.00773	-2.7345	-19.2062	-1.3359	CC	GG	GG	AA	CC	AA	AA	TT	GG	2.9458
USDA-ARS	club	5+10	Rht2	QAM313	X970071-1	CC	CC	GG	GG	GG	CC	CC	AA	TT	TT	CC	GG	TT	CC	TT	CC	GG	TT	CC	AA	CC	GG	CC	0.1078	1.6974	0.5645	-0.02529	-2.0651	-3.0057	0.4528	CC	GG	GG	GG	CC	CC	AA	TT	AA	2.4476
USDA-ARS	club	2+12	Rht2	QAM314	X970108-1C	CC	CC	GG	GG	AA	CC	CC	AA	CC	TT	CC	GG	CC	CC	TT	CC	GG	CC	CC	GG	TT	GG	CC	0.2369	3.8982	1.0279	-0.00121	-1.846	-24.908	-1.2084	CC	GG	GG	AA	CC	CC	AA	CC	GG	1.354
USDA-ARS	club	2+12	Rht2	QAM315	X970108-2	CC	CC	GG	GG	AA	CC	AA	AA	CC	TT	CC	GG	CC	CC	TT	CC	GG	CC	CC	GG	TT	GG	CC	0.2051	1.6105	1.1409	-0.00421	-4.2602	-26.8086	-2.5012	CC	GG	GG	AA	CC	AA	AA	CC	GG	1.6691
USDA-ARS	club	2+12	Rht2	QAM316	X970108-2C	CC	CC	GG	GG	AA	CC	CC	AA	CC	TT	CC	GG	CC	CC	TT	CC	GG	CC	CC	GG	TT	GG	CC	0.2026	3.5149	1.3465	0.001808	-3.3129	-26.5371	-2.2068	CC	GG	GG	AA	CC	CC	AA	CC	GG	1.4959
USDA-ARS	club	2+12	Rht2	QAM317	X970108-3	CC	CC	AA	GG	AA	CC	AA	AA	CC	TT	CC	GG	CC	CC	TT	CC	GG	TT	CC	GG	TT	GG	CC	0.2535	3.4721	2.1861	-0.01084	-4.9258	-27.3517	-2.7602	CC	AA	GG	AA	CC	AA	AA	CC	AA	3.4544
USDA-ARS	lax	H	Rht1	QAM318	X970149-1L	CC	CC	AA	GG	AA	CC	CC	AA	CC	TT	CC	GG	CC	CC	TT	CC	GG	CC	CC	GG	TT	GG	CC	0.09815	1.4246	-0.4621	0.01822	-0.08258	-4.8159	-0.9877	CC	AA	GG	AA	CC	CC	AA	CC	AA	-1.944
USDA-ARS	lax	2+12	Rht1	QAM319	X970149-7L	CC	CC	AA	GG	AA	CC	CC	AA	CC	TT	CC	GG	CC	CC	TT	CC	GG	CC	CC	GG	TC	GG	CC	-0.00066	0.249	0.03352	-0.0009	1.3326	-3.8203	0.2558	CC	AA	GG	AA	CC	CC	AA	CC	AA	0.09246
USDA-ARS	lax	2+12	Rht1	QAM320	X970161-2L	CC	CC	GG	GG	AA	CC	CC	AA	CC	TT	CC	GG	CC	CC	TT	CC	GG	CC	CC	AA	TT	GG	CC	0.03778	-0.3282	0.1721	0.02044	-0.8271	-11.8753	0.1208	CC	GG	GG	AA	CC	CC	AA	CC	GG	-1.2042
USDA-ARS	club	2+12	Rht2	QAM321	X970163-3	CC	CC	AA	GG	AA	CC	AA	AA	CC	TT	CC	GG	CC	CC	TT	CC	GG	CC	CC	GG	CC	GG	CC	0.1822	2.1323	0.9063	0.009241	-0.807	-11.8753	0.5456	CC	AA	GG	AA	CC	AA	AA	CC	AA	0.4205
USDA-ARS	lax	2+12	.	QAM322	X970167-1	TT	CC	AA	GG	GG	CC	AA	GG	TT	TT	CC	GG	CC	TT	TT	CC	GG	TT	CC	GG	CC	GG	CC	-0.05943	0.7051	-0.3118	-0.00348	2.0268	-2.8247	0.2597	CC	AA	GG	GG	CC	AA	GG	TT	GG	-0.1957
USDA-ARS	lax	5+10	Rht1	QAM323	X970167-2L	CC	CC	GG	AA	GG	TT	CC	GG	TT	TT	CC	AA	TT	TT	TT	AA	GG	TT	TT	GG	CC	GG	CC	0.05472	-0.5532	-0.4314	-0.00439	-0.3682	35.64	0.3909	CC	GG	AA	GG	TT	CC	GG	TT	AA	-0.2117
USDA-ARS	lax	5+10	Rht1	QAM324	X970167-3L	CC	CC	AA	GG	GG	CC	AA	AA	TT	TT	CC	GG	CC	TT	TT	CC	GG	TT	CC	GG	CC	GG	CC	-0.205	-0.4087	-0.3363	0.01133	3.3573	16.7244	2.2543	CC	AA	GG	GG	CC	AA	AA	TT	GG	-1.2509
USDA-ARS	lax	5+10	Rht1	QAM325	X970167-5L	CC	CC	AA	GG	GG	CC	AA	AA	CC	TT	CC	GG	CC	TT	TT	CC	GG	TT	CC	GG	CC	GG	CC	-0.03527	-0.3926	0.06277	-0.00105	0.4687	19.8016	1.7682	CC	AA	GG	GG	CC	AA	AA	CC	GG	0.1425
USDA-ARS	lax	2+12	Rht1	QAM326	X970168-1L	CC	CC	AA	AA	AA	CC	CC	AA	CC	TT	CC	GG	CC	TT	TT	CC	GG	CC	CC	GG	TT	GG	CC	0.04899	2.6725	0.7769	-0.01279	-0.203	6.6783	-2.148	CC	AA	AA	AA	CC	CC	AA	CC	AA	1.9634
USDA-ARS	lax	2+12	Rht1	QAM327	X970168-2L	CC	CC	AA	AA	AA	CC	CC	AA	CC	TT	CC	GG	CC	TT	TT	CC	GG	CC	CC	GG	TC	GG	CC	0.1487	3.4131	0.4807	-0.01279	-2.2567	-9.5221	-2.0306	CC	AA	AA	AA	CC	CC	AA	CC	AA	1.6258
USDA-ARS	lax	2+12	Rht1	QAM328	X970170-2	CC	CC	GG	AA	AA	CC	CC	GG	CC	TT	CC	GG	TT	TT	TT	CC	GG	CC	CC	AA	CC	GG	CC	0.0245	-0.2938	-0.04817	0.02287	0.5645	9.484	0.2073	CC	GG	AA	AA	CC	CC	GG	CC	GG	-1.7556
USDA-ARS	lax	2+12	Rht1	QAM329	X970170L	CC	CC	GG	GG	GG	CC	NN	AA	CC	TT	CC	GG	CC	CC	TT	CC	GG	CC	CC	GG	TT	GG	CC	0.09867	1.1205	-0.283	0.006728	1.5216	-1.9197	-0.8514	CC	GG	GG	GG	CC	NN	AA	CC	GG	-0.7361
USDA-ARS	lax	2+12	Rht2	QAM330	X970175-1L	CC	TT	GG	GG	AA	CC	AA	AA	TT	TT	TT	GG	CC	CC	TT	CC	GG	TT	CC	GG	CC	GG	TT	-0.07085	-1.3777	2.0565	-0.01528	-1.2523	-20.1113	-0.3481	TT	GG	GG	AA	CC	AA	AA	TT	GG	3.6695
USDA-ARS	club	2+12	Rht2	QAM331	X970175-3C	CC	TT	GG	GG	AA	CC	AA	AA	TT	TT	TT	GG	CC	CC	TT	CC	GG	CC	CC	GG	CC	GG	TT	-0.01598	-1.6785	0.9845	-0.00453	-1.2005	-21.2878	-0.3275	TT	GG	GG	AA	CC	AA	AA	TT	GG	1.542
USDA-ARS	club	2+12	Rht2	QAM332	X970175-4C	CC	CC	AA	GG	AA	CC	AA	AA	CC	TT	CC	GG	CC	CC	TT	CC	GG	CC	CC	GG	TT	GG	CC	0.2894	2.598	2.0479	-0.00422	-3.8997	-13.8664	-3.3226	CC	AA	GG	AA	CC	AA	AA	CC	AA	2.7937
USDA-ARS	club	2+12	.	QAM333	X970175-6C	CC	CC	AA	GG	AA	CC	AA	AA	CC	TT	CC	GG	CC	CC	TT	CC	GG	CC	CC	GG	TT	GG	CC	0.2421	2.7391	1.9137	0.00492	-4.9559	-15.586	-3.6162	CC	AA	GG	AA	CC	AA	AA	CC	AA	2.502
USDA-ARS	club	2+12	Rht2	QAM334	X970185-1C	CC	CC	AA	GG	AA	CC	CC	GG	TT	TT	CC	AA	CC	CC	TT	CC	GG	TT	CC	GG	TC	GG	CC	0.09836	0.9896	0.4188	-0.00783	-2.4356	-19.6587	-1.31	CC	AA	GG	AA	CC	CC	GG	TT	AA	1.0479
USDA-ARS	club	2+12	wildtype	QAM335	X970229	CC	CC	GG	GG	AA	CC	AA	AA	TT	TT	CC	GG	CC	CC	TT	CC	GG	CC	CC	AA	CC	GG	CC	0.05207	1.1602	0.3946	-0.02448	-1.4939	-21.1973	-0.2101	CC	GG	GG	AA	CC	AA	AA	TT	AA	2.2804
USDA-ARS	club	5+10	Rht1	QAM336	X970235	CC	CC	GG	GG	AA	CC	NN	AA	CC	TT	CC	GG	CC	TT	TT	CC	GG	TT	CC	AA	TT	GG	CC	-0.0288	0.5535	0.2906	-0.01842	-1.3355	-0.6526	-0.5194	CC	GG	GG	AA	CC	NN	AA	CC	AA	1.6389
USDA-ARS	club	2+12	Rht2	QAM337	X970281	CC	CC	AA	GG	GG	CC	AA	AA	CC	TT	CC	GG	CC	TT	TT	CC	GG	TT	CC	GG	TT	GG	CC	0.08748	0.1647	-1.8199	-0.03386	-1.2787	-4.9969	0.4873	CC	AA	GG	GG	CC	AA	AA	CC	AA	0.1541
USDA-ARS	club	5+10	Rht2	QAM338	X980302-8C	CC	CC	GG	GG	AA	TT	AA	AA	CC	TT	CC	GG	CC	CC	TT	CC	GG	CC	TT	AA	TT	GG	CC	0.08512	-0.8303	-0.1283	0.01963	-0.3656	-4.7253	-0.1138	CC	GG	GG	AA	TT	AA	AA	CC	GG	-1.517
USDA-ARS	lax	2+12	Rht1	QAM339	X980336-5L	CC	CC	AA	GG	AA	CC	CC	AA	CC	TT	CC	GG	CC	TT	TT	CC	GG	CC	CC	GG	CC	GG	CC	-0.03009	2.2886	0.4321	0.01467	-0.6586	6.6783	-0.5436	CC	AA	GG	AA	CC	CC	AA	CC	AA	-0.5677
USDA-ARS	club	5+10	Rht2	QAM340	X980421-1C	TT	CC	AA	GG	GG	CC	AA	AA	TT	TT	CC	GG	CC	TT	NN	CC	GG	CC	CC	AA	CC	GG	CC	-0.1241	0.6443	0.3004	-0.00887	-0.8435	19.0776	1.0104	CC	AA	GG	GG	CC	AA	AA	TT	GG	0.9795
USDA-ARS	lax	5+10	Rht1	QAM341	X980434-1L	TT	CC	AA	GG	GG	CC	NN	GG	CC	TT	CC	GG	TT	TT	TT	CC	GG	NN	CC	AA	TT	GG	CC	-0.03449	2.7983	0.07503	-0.0248	-0.1409	13.1947	0.0484	CC	AA	GG	GG	CC	NN	GG	CC	AA	1.8422
USDA-ARS	lax	5+10	Rht1	QAM342	X980437-3L	CC	CC	GG	GG	AA	CC	AA	GG	TT	TT	CC	GG	CC	TT	TT	CC	GG	TT	CC	AA	CC	GG	CC	-0.04227	2.9863	0.1077	-0.0375	-1.9633	9.665	-1.5608	CC	GG	GG	AA	CC	AA	GG	TT	AA	2.8981
USDA-ARS	club	2+12	Rht1	QAM343	X980451-4C	CC	CC	AA	GG	AA	CC	AA	GG	TT	TT	CC	GG	CC	CC	CC	CC	GG	TT	CC	GG	CC	GG	CC	0.004366	1.9547	0.6373	0.004822	-3.3211	-10.2462	-0.8396	CC	AA	GG	AA	CC	AA	GG	TT	AA	0.4044
USDA-ARS	club	2+12	.	QAM344	X990070-C	CC	CC	AA	GG	GG	CC	AA	AA	TT	TT	CC	GG	CC	CC	TT	CC	GG	CC	CC	GG	CC	GG	CC	-0.07011	-0.6785	0.2559	0.002285	-0.201	1.429	-0.2262	CC	AA	GG	GG	CC	AA	AA	TT	AA	0.1555
USDA-ARS	lax	2+12	.	QAM345	ARS970161-3L(Selbu)	CC	CC	GG	GG	AA	CC	CC	AA	CC	TT	CC	GG	CC	CC	TT	CC	GG	CC	CC	AA	TT	GG	CC	0.09031	-0.2663	0.09153	0.01939	-1.0595	-13.5312	0.3978	CC	GG	GG	AA	CC	CC	AA	CC	GG	-1.214
USDA-ARS	lax	2+12	.	QAM346	AMBER	CC	CC	AA	GG	GG	NN	AA	AA	NN	TT	CC	GG	TT	CC	TT	CC	GG	CC	NN	GG	TC	GG	CC	0.04274	2.4934	1.0623	-0.00545	-0.2099	-2.385	-0.7692	CC	AA	GG	GG	NN	AA	AA	NN	AA	1.6666
USDA-ARS	club	2+12	Rht2	QAM347	ARS00173	CC	CC	GG	AA	AA	CC	AA	AA	TT	TT	CC	GG	CC	CC	TT	CC	GG	CC	CC	GG	CC	GG	CC	0.147	1.7703	0.3843	0.01679	-1.9042	-20.6543	-1.2633	CC	GG	AA	AA	CC	AA	AA	TT	AA	-0.6917
USDA-ARS	club	2+12	Rht2	QAM348	ARS00226	CC	CC	GG	GG	AA	CC	AA	NN	TT	TT	CC	GG	CC	NN	TC	CC	GG	CC	CC	GG	TC	GG	CC	0.04209	1.0298	0.2115	0.03189	0.4075	-17.0341	0.1498	CC	GG	GG	AA	CC	AA	NN	TT	GG	-1.941
USDA-ARS	club	2+12	Rht2	QAM349	ARS00235	TT	CC	GG	GG	AA	CC	CC	AA	TT	TT	CC	GG	CC	CC	TT	CC	GG	CC	CC	AA	TC	GG	CC	0.03533	1.3677	0.4562	0.01125	-1.3704	-17.3961	-0.4225	CC	GG	GG	AA	CC	CC	AA	TT	AA	-0.1892
USDA-ARS	club	2+12	Rht2	QAM350	ARS00258	CC	CC	GG	GG	AA	CC	CC	AA	CC	TT	CC	GG	CC	CC	TT	CC	GG	TT	CC	AA	TT	GG	CC	-0.0892	1.1188	-0.584	0.02295	1.5342	-14.2284	0.9696	CC	GG	GG	AA	CC	CC	AA	CC	GG	-2.3547
USDA-ARS	club	5+10	Rht2	QAM351	ARS96158	CC	CC	AA	GG	GG	CC	AA	AA	CC	TT	CC	GG	CC	CC	TT	CC	GG	CC	CC	GG	TT	GG	CC	-0.03334	1.151	0.5227	0.02554	0.2514	-6.3544	0.4658	CC	AA	GG	GG	CC	AA	AA	CC	AA	-1.2352
USDA-ARS	lax	2+12	Rht1	QAM352	ARS96277	CC	CC	GG	AA	AA	CC	AA	GG	TT	TT	CC	GG	CC	TT	CC	CC	GG	TT	CC	GG	CC	GG	CC	-0.09607	-1.7254	-2.0867	0.01559	1.1318	7.1309	1.2568	CC	GG	AA	AA	CC	AA	GG	TT	AA	-3.7165
USDA-ARS	club	2+12	Rht2	QAM353	ARS970042-1C	CC	CC	AA	GG	AA	CC	AA	AA	CC	TT	CC	GG	CC	CC	TT	CC	GG	TT	CC	AA	TT	GG	CC	0.1592	4.8951	1.9658	-0.00584	-0.4377	-21.9214	-1.7369	CC	AA	GG	AA	CC	AA	AA	CC	AA	2.8296
USDA-ARS	club	5+10	Rht2	QAM354	ARS970071-3C	CC	CC	GG	GG	GG	TT	CC	AA	CC	TT	CC	GG	TT	CC	TT	CC	GG	CC	TT	AA	TT	GG	CC	-0.00131	0.4386	0.2369	-0.01778	1.3938	4.2168	1.121	CC	GG	GG	GG	TT	CC	AA	CC	AA	1.5672
USDA-ARS	club	2+12	Rht1	QAM355	ARS970168-2C	CC	CC	AA	AA	AA	CC	CC	AA	CC	TT	CC	GG	CC	TT	TT	CC	GG	CC	CC	GG	TC	GG	CC	0.1344	4.1372	1.2825	-0.01958	-1.3179	-1.5577	-1.2084	CC	AA	AA	AA	CC	CC	AA	CC	AA	3.2457
USDA-ARS	lax	2+12	Rht1	QAM356	ARS970170-2L	CC	CC	GG	AA	AA	CC	CC	GG	CC	TT	CC	GG	TT	TT	TT	CC	GG	CC	CC	AA	CC	GG	CC	-0.07992	-0.1752	-0.5653	0.01713	0.9706	6.3163	-0.1513	CC	GG	AA	AA	CC	CC	GG	CC	GG	-1.9969
USDA-ARS	club	5+10	Rht1	QAM357	ARS970184-1C	CC	CC	AA	GG	AA	CC	AA	GG	CC	TT	CC	AA	CC	CC	TT	CC	GG	TT	CC	GG	TT	GG	CC	0.1456	0.6795	-0.8769	-0.01184	-1.4415	-9.598	-1.079	CC	AA	GG	AA	CC	AA	GG	CC	AA	-0.3174
USDA-ARS	club	2+12	Rht1	QAM358	ARS9702782	CC	CC	GG	GG	AA	CC	AA	AA	TT	TT	CC	GG	CC	CC	TC	CC	GG	CC	CC	AA	CC	GG	CC	0.08369	0.5567	-0.3683	-0.00111	-0.02967	-12.3278	0.2945	CC	GG	GG	AA	CC	AA	AA	TT	GG	-0.4216
USDA-ARS	club	2+12	Rht2	QAM359	ARS97173	TT	CC	AA	GG	AA	CC	AA	AA	CC	TT	CC	GG	CC	CC	TT	CC	GG	CC	CC	GG	TT	GG	CC	0.1418	0.4553	-0.01153	-0.01956	-3.7703	-22.1929	-1.7492	CC	AA	GG	AA	CC	AA	AA	CC	GG	1.3553
USDA-ARS	club	H	Rht1	QAM360	ARS97230-6C	CC	CC	AA	GG	AA	CC	CC	AA	NN	TT	CC	GG	CC	CC	TT	CC	GG	TT	CC	AA	TC	GG	CC	0.02924	0.6938	-0.9876	-0.02096	-0.491	-13.6092	-1.1105	CC	AA	GG	AA	CC	CC	AA	NN	AA	0.253
USDA-ARS	club	5+10	Rht2	QAM361	ARS98237	CC	CC	GG	GG	AA	CC	AA	GG	CC	TT	CC	GG	CC	CC	CC	CC	GG	TT	CC	GG	TT	GG	CC	0.1509	0.6444	-0.04051	0.01225	-2.8196	-5.0874	-1.2516	CC	GG	GG	AA	CC	AA	GG	CC	GG	-0.9256
USDA-ARS	club	5+10	Rht2	QAM362	ARS98X402-1C	CC	CC	GG	GG	GG	CC	CC	AA	TT	TT	CC	GG	CC	CC	TT	CC	GG	TT	CC	AA	CC	GG	CC	-0.0732	1.3344	-0.5657	-0.00397	0.06715	1.7708	0.563	CC	GG	GG	GG	CC	CC	AA	TT	AA	-0.3661
USDA-ARS	club	2+12	Rht2	QAM363	ARS99123	CC	CC	AA	GG	GG	CC	CC	AA	CC	TT	CC	GG	TT	TT	TT	CC	GG	TT	CC	AA	TT	GG	CC	-0.1551	1.5106	-0.2045	-0.02455	0.3407	-2.9152	1.4196	CC	AA	GG	GG	CC	CC	AA	CC	AA	1.4178
USDA-ARS	club	2+12	Rht2	QAM364	ARSC96059-1	CC	CC	GG	GG	AA	CC	AA	AA	CC	GG	CC	GG	CC	NN	TT	CC	GG	CC	CC	AA	TT	GG	CC	0.01227	1.9002	0.5671	-0.01105	-0.8485	-22.3739	-0.445	CC	GG	GG	AA	CC	AA	AA	CC	AA	1.6407
USDA-ARS	club	2+12	Rht2	QAM365	ARSC96059-2	CC	CC	GG	GG	AA	CC	AA	AA	CC	GG	CC	GG	CC	NN	TT	CC	GG	CC	CC	AA	TT	GG	CC	0.0575	3.5779	1.0721	-0.00536	0.9706	-21.6498	-0.3862	CC	GG	GG	AA	CC	AA	AA	CC	AA	1.7582
U of I	lax	2+12	Rht1	QAM366	ID96-16702A	TT	TC	AA	AA	GG	CC	CC	GG	CC	TT	TC	GG	NN	TT	TT	CC	GG	CC	CC	GG	TT	GG	TC	-0.00583	1.8303	-0.1062	-0.0082	-0.08564	-12.6898	-0.5624	TC	AA	AA	GG	CC	CC	GG	CC	AA	0.5837
OSU	lax	2+12	Rht1	QAM367	TUBBS06	CC	CC	GG	AA	AA	TT	AA	GG	TT	GG	CC	GG	CC	TT	TC	CC	GG	TT	TT	AA	CC	GG	CC	-0.2208	-1.6383	-0.0459	0.02533	2.6293	-3.1453	1.9875	CC	GG	AA	AA	TT	AA	GG	TT	NN	-1.7437
U of I	lax	2+12	Rht1	QAM368	BITTERROOT	CC	CC	GG	AA	AA	CC	CC	GG	TT	TT	CC	GG	TT	TT	TC	CC	GG	CC	CC	GG	CC	GG	CC	0.1305	1.6308	0.1935	0.000904	-2.4934	-0.871	-1.7766	CC	GG	AA	AA	CC	CC	GG	TT	AA	0.1239
WSU	club	.	Rht1	QAM369	BRUEHL	CC	CC	GG	AA	AA	TT	CC	GG	CC	TT	CC	AA	CC	CC	TT	AA	GG	TT	TT	AA	TT	GG	CC	0.2028	0.05153	0.6355	0.01841	-3.6178	-14.5825	-2.1481	CC	GG	AA	AA	TT	CC	GG	CC	GG	-0.3956
U of I	lax	2+12	Rht1	QAM370	BRUNDAGE96	TT	CC	NN	GG	NN	CC	AA	AG	TT	GG	CC	GG	CC	TT	NN	CC	GG	CC	CC	GG	TC	GG	CC	0.1264	1.2382	-0.1361	0.02369	-1.3761	-2.9652	-2.3624	CC	NN	GG	NN	CC	AA	AG	TT	NN	-1.7298
U of I	lax	5+10	Rht1	QAM371	BRUNDAGECF	TT	CC	GG	AA	GG	CC	AA	GG	CC	GG	CC	GG	TT	TT	TT	CC	GG	CC	CC	GG	TT	GG	CC	0.2046	1.1005	-1.1338	0.01837	-1.8093	-2.0076	-3.4954	CC	GG	AA	GG	CC	AA	GG	CC	AA	-2.7191
U of I	lax	2+12	Rht1	QAM372	BRUNEAU	CC	CC	AA	AA	GG	CC	CC	GG	TT	TT	CC	GG	CC	TT	CC	CC	GG	TT	CC	GG	CC	GG	CC	0.1284	-0.3496	-0.7	-0.03988	-0.5764	6.38	-0.0678	CC	AA	AA	GG	CC	CC	GG	TT	AA	1.7197
USDA-ARS	club	5+10	Rht2	QAM373	CARA	CC	CC	AA	GG	AA	CC	AA	AA	CC	TT	CC	GG	CC	CC	TT	CC	GG	TT	CC	GG	TT	GG	CC	0.2142	2.443	1.6207	-0.00571	-5.5846	-15.6913	-3.1707	CC	AA	GG	AA	CC	AA	AA	CC	AA	2.3811
USDA-ARS	club	5+10	Rht2	QAM374	CHRYSTAL	CC	CC	GG	AA	AA	TT	AA	AA	CC	TT	CC	GG	CC	CC	TT	CC	GG	TT	TT	GG	TT	GG	CC	0.08238	1.9529	0.3199	-0.01187	-1.3147	-4.3763	-0.9201	CC	GG	AA	AA	TT	AA	AA	CC	AA	1.1507
USDA-ARS	club	5+10	Rht2	QAM375	CHUKAR	CC	CC	AA	GG	AA	CC	AA	AA	CC	TT	CC	GG	CC	CC	TT	CC	GG	NN	CC	GG	TT	GG	CC	0.2774	2.4183	0.9318	-0.00422	-4.5396	-14.6868	-2.8055	CC	AA	GG	AA	CC	AA	AA	CC	AA	1.401
USDA-ARS	club	.	Rht2	QAM376	CODA	CC	CC	GG	GG	AA	CC	CC	AA	TT	TT	CC	GG	CC	CC	TT	CC	GG	CC	CC	AA	CC	GG	CC	-0.0303	0.974	0.9409	-0.00582	-2.7456	-19.0693	-0.561	CC	GG	GG	AA	CC	CC	AA	TT	AA	1.5148
Columbia Seed WA	lax	2+12	Rht2	QAM377	CONCEPT	CC	CC	GG	AA	GG	TT	CC	GG	TT	TT	CC	GG	TT	CC	TT	CC	GG	TT	TT	AA	CC	GG	CC	0.09526	-1.9498	-1.9048	-0.00803	1.2939	-4.9064	-0.4318	CC	GG	AA	GG	TT	CC	GG	TT	GG	-1.8863
USDA-ARS	club	2+12	Rht2	QAM378	CRESCENT	CC	CC	AA	GG	AA	CC	AA	AA	CC	TT	CC	GG	CC	CC	TT	CC	GG	CC	CC	GG	TT	GG	CC	0.1882	2.8921	1.7208	-0.0066	-2.3523	-19.6233	-1.6374	CC	AA	GG	AA	CC	AA	AA	CC	AA	2.5655
U of I	lax	2+12	Rht1	QAM379	DUNE	CC	CC	GG	AA	GG	CC	CC	GG	TT	TT	CC	GG	TT	TT	TT	CC	GG	TT	CC	GG	CC	GG	CC	-0.02422	-1.018	0.1159	0.01159	0.172	-8.074	-0.00563	CC	GG	AA	GG	CC	CC	GG	TT	GG	-0.6718
WSU	club	2+12	wildtype	QAM380	EDWIN	CC	CC	GG	GG	GG	CC	AA	AA	CC	TT	CC	GG	TT	CC	TT	CC	GG	TT	CC	AA	TT	GG	CC	0.1008	0.1838	0.8723	-0.00858	-1.6398	-7.712	-0.9124	CC	GG	GG	GG	CC	AA	AA	CC	GG	1.5791
WSU	lax	5+10	Rht1	QAM381	ELTAN	CC	CC	GG	AA	GG	TT	CC	GG	TT	TT	CC	AA	TT	TT	TT	AA	GG	TT	TT	GG	CC	GG	CC	-0.02146	-0.6203	-1.9293	-0.01684	1.2379	38.3552	0.5746	CC	GG	AA	GG	TT	CC	GG	TT	AA	-1.5031
USDA-ARS	lax	.	Rht1	QAM382	FINCH	CC	CC	AA	GG	AA	CC	CC	AA	CC	TT	CC	GG	CC	TT	TT	CC	GG	CC	CC	GG	CC	GG	CC	-0.02289	0.7523	-0.219	0.01399	2.5571	2.9612	0.6924	CC	AA	GG	AA	CC	CC	AA	CC	AA	-1.2207
OSU	lax	2+12	Rht1	QAM383	GOETZE	TT	NN	GG	GG	AA	CC	AA	GG	TT	TT	NN	GG	TT	TT	TT	CC	AA	TT	CC	AA	CC	AA	NN	-0.1474	-2.3579	-1.0168	0.04466	0.9641	3.2692	1.541	NN	GG	GG	AA	CC	AA	GG	TT	GG	-4.0769
WSU	club	2+12	Rht2	QAM384	HILLER	CC	CC	GG	GG	AA	CC	CC	AA	CC	TT	CC	GG	CC	CC	TT	CC	GG	TT	CC	AA	TT	GG	CC	0.2238	1.6248	1.8483	0.008486	-5.3231	-25.574	-3.1702	CC	GG	GG	AA	CC	CC	AA	CC	GG	1.6188
U of I	lax	H	Rht1	QAM385	ID00-475-2DH	CC	CC	AA	GG	GG	CC	CC	AA	TT	TT	CC	GG	TT	TT	CC	CC	GG	TT	CC	GG	CC	GG	CC	-0.00583	0.5721	-0.1062	0.003167	0.3251	33.1059	-0.2101	CC	AA	GG	GG	CC	CC	AA	TT	AA	-0.3949
U of I	lax	H	Rht2	QAM386	ID581	CC	TT	GG	GG	GG	CC	CC	GG	TT	GG	TT	GG	TT	CC	TT	CC	GG	TT	CC	GG	CC	GG	TT	-0.0562	-1.3425	-0.4171	-0.00115	-0.2578	18.5345	-0.8221	TT	GG	GG	GG	CC	CC	GG	TT	AA	-0.4486
U of I	lax	2+12	Rht1	QAM387	ID587CF	CC	TT	GG	AA	AA	CC	CC	GG	TT	TT	TT	GG	CC	TT	TT	CC	GG	TT	CC	GG	CC	GG	TT	-0.0669	-2.0882	0.1062	0.01688	0.5933	-13.0789	0.8435	TT	GG	AA	AA	CC	CC	GG	TT	GG	-0.9203
U of I	lax	5+10	Rht1	QAM388	ID589	TT	CC	GG	AA	GG	CC	AA	GG	CC	TT	CC	GG	TT	TT	TT	CC	GG	CC	CC	GG	TT	GG	CC	0.06971	0.6062	-0.8093	0.01788	-0.6172	-0.6526	-2.4986	CC	GG	AA	GG	CC	AA	GG	CC	AA	-2.3717
U of I	lax	2+12	Rht1	QAM390	ID654	CC	TT	GG	AA	AA	CC	CC	AA	TT	TT	TT	GG	CC	TT	TT	CC	GG	TT	CC	GG	CC	GG	TT	-0.02779	-1.4522	0.3615	-0.00216	-2.7774	-9.7031	-0.08682	TT	GG	AA	AA	CC	CC	AA	TT	GG	0.6093
U of I	lax	5+10	Rht1	QAM391	ID655	CC	TT	GG	AA	GG	CC	CC	AA	TT	TT	TT	GG	TT	CC	TT	CC	GG	TT	CC	GG	CC	GG	TT	-0.01255	-2.2025	-0.6781	-0.01759	-1.5814	5.3207	0.4484	TT	GG	AA	GG	CC	CC	AA	TT	GG	0.4338
U of I	lax	2+12	Rht1	QAM392	ID663	CC	TT	GG	AA	AA	CC	CC	GG	TT	TT	TT	GG	CC	TT	TT	CC	GG	TT	CC	GG	CC	GG	TT	-0.1187	-1.0266	-0.5205	-0.00436	1.2692	-3.9198	0.6661	TT	GG	AA	AA	CC	CC	GG	TT	GG	0.4014
U of I	lax	5+10	Rht1	QAM393	ID859	TT	CC	GG	AA	GG	CC	AA	GG	CC	GG	CC	GG	TT	TT	TT	CC	GG	CC	CC	GG	TT	GG	CC	0.1904	1.8914	0.09058	0.01725	-2.4469	1.2389	-1.9216	CC	GG	AA	GG	CC	AA	GG	CC	AA	-1.3365
U of I	lax	2+12	Rht1	QAM394	ID99-419	CC	CC	AA	GG	GG	CC	CC	AA	TT	TT	CC	GG	TT	TT	TT	CC	GG	TT	CC	GG	CC	GG	CC	0.1135	1.9151	-0.8988	0.01267	1.6618	21.7927	-1.5325	CC	AA	GG	GG	CC	CC	AA	TT	AA	-2.0014
U of I	lax	2+12	Rht1	QAM395	LAMBERTCF	CC	CC	GG	AA	GG	CC	CC	GG	TT	TT	CC	GG	TT	TT	TT	CC	GG	TT	CC	AA	CC	GG	CC	-0.1228	-0.2712	0.02853	-0.00661	1.5696	-0.4041	1.1465	CC	GG	AA	GG	CC	CC	GG	TT	GG	0.455
USDA-ARS	lax	2+12	Rht1	QAM396	MADSEN	CC	CC	GG	AA	AA	CC	AA	GG	TT	TT	CC	GG	CC	TT	CC	CC	GG	TT	CC	AA	CC	GG	CC	-0.1644	-0.8104	0.1824	0.01258	-0.1697	1.2353	0.7145	CC	GG	AA	AA	CC	AA	GG	TT	AA	-0.6107
OSU	lax	2+12	Rht1	QAM397	MARY	CC	TC	GG	AA	GG	CC	AA	GG	TT	TT	TC	GG	CC	TT	TC	CC	GG	NN	CC	AA	CC	GG	TC	-0.04262	0.8102	0.3112	-0.00104	-0.7167	6.5309	-0.303	TC	GG	AA	GG	CC	AA	GG	TT	AA	0.4548
WSU	lax	2+12	Rht1	QAM398	MASAMI	CC	CC	AA	AA	NN	TT	AA	GG	TT	TT	CC	GG	CC	TT	TT	CC	GG	CC	TT	AA	CC	GG	CC	-0.01205	0.5157	-0.1926	0.01047	0.5639	-0.8196	0.166	CC	AA	AA	NN	TT	AA	GG	TT	AA	-0.9725
OSU	lax	2+12	Rht2	QAM399	OR208047P94	TT	TT	GG	AA	GG	CC	AA	GG	TT	TT	TT	GG	TT	TT	CC	CC	AA	NN	CC	AA	CC	AA	TT	-0.146	3.0187	0.7354	0.00601	-0.9658	19.1681	-0.5037	TT	GG	AA	GG	CC	AA	GG	TT	GG	0.3489
OSU	lax	2+12	.	QAM400	OR2010239	CC	CC	AA	AA	AA	TT	AA	GG	TT	TT	CC	GG	CC	TT	TT	CC	GG	TT	TT	AA	CC	GG	CC	-0.0589	1.4979	0.03593	0.000256	0.7905	-4.8159	-0.2445	CC	AA	AA	AA	TT	AA	GG	TT	GG	-0.03434
OSU	lax	2+12	Rht1	QAM402	OR2020787	CC	TT	GG	AA	AA	CC	CC	GG	TT	TT	TT	GG	CC	TT	TT	CC	GG	TT	CC	GG	CC	GG	TT	-0.06316	-2.7605	0.1727	0.003864	-1.8285	-5.0874	1.0427	TT	GG	AA	AA	CC	CC	GG	TT	GG	-0.1236
OSU	lax	2+12	Rht1	QAM403	OR2030238	CC	CC	AA	AA	AA	CC	CC	GG	TT	TT	CC	GG	CC	TT	CC	CC	AA	TT	CC	AA	CC	AA	CC	-0.2898	-0.4254	0.1197	-0.00523	1.1334	33.6489	2.2133	CC	AA	AA	AA	CC	CC	GG	TT	AA	0.446
OSU	lax	2+12	Rht1	QAM404	OR2030239	CC	CC	AA	AA	AA	CC	CC	GG	TT	TT	CC	GG	CC	TT	CC	CC	AA	TT	CC	AA	CC	AA	CC	-0.3329	-0.8685	0.317	-0.00951	1.5858	32.2008	2.8345	CC	AA	AA	AA	CC	CC	GG	TT	AA	1.0269
OSU	lax	2+12	Rht1	QAM405	OR2030411	CC	TC	GG	NN	AA	TT	AA	AA	TT	TT	TC	NN	TT	TT	TC	NN	AA	TT	TT	AA	NN	AA	TC	-0.2576	-3.2817	-0.243	0.01044	1.8831	1.429	1.8547	TC	GG	NN	AA	TT	AA	AA	TT	GG	-1.1515
OSU	lax	2+12	Rht1	QAM406	OR2030554	CC	TT	GG	AA	NN	NN	AA	NN	TT	TT	TT	GG	NN	TT	TC	CC	GG	TT	NN	NN	CC	GG	TT	-0.08211	-0.1556	-0.4493	0.000274	0.2491	3.0581	-1.0694	TT	GG	AA	NN	NN	AA	NN	TT	NN	-0.653
OSU	lax	2+12	Rht1	QAM407	OR2040728	CC	TC	GG	AA	AA	CC	CC	GG	NN	NN	TC	NN	CC	TT	NN	AA	GG	TT	CC	AA	CC	GG	TC	-0.153	0.1376	1.0276	0.002953	-0.8313	12.6517	-0.09926	TC	GG	AA	AA	CC	CC	GG	NN	NN	1.0223
OSU	lax	2+12	Rht1	QAM408	OR2050293	CC	CC	GG	AA	AA	TT	AA	GG	TT	TT	CC	GG	CC	TT	TT	CC	GG	TT	TT	AA	CC	GG	CC	-0.2379	-2.6118	-1.2869	0.02454	3.6192	-1.5104	1.6702	CC	GG	AA	AA	TT	AA	GG	TT	GG	-3.3826
OSU	lax	2+12	Rht1	QAM409	OR2050299	CC	CC	GG	AA	AA	TT	AA	NN	CC	GG	CC	GG	TT	TT	CC	CC	AA	TT	TT	AA	TT	AA	CC	-0.1018	-0.187	0.4766	0.02571	1.4498	4.9587	0.5072	CC	GG	AA	AA	TT	AA	NN	CC	GG	-1.2456
OSU	lax	2+12	Rht1	QAM410	OR2050301	CC	CC	GG	AA	AA	TT	CC	GG	CC	GG	CC	GG	CC	TT	TT	CC	AA	TT	TT	AA	CC	AA	CC	-0.2482	1.4258	0.6142	0.0272	1.5227	21.5503	2.0895	CC	GG	AA	AA	TT	CC	GG	CC	AA	-1.2297
OSU	lax	2+12	Rht1	QAM411	OR2050853	CC	TT	GG	AA	GG	TT	CC	GG	TT	TT	TT	GG	TT	TT	CC	CC	AA	NN	TT	AA	CC	AA	TT	-0.2393	-2.0146	-1.4633	0.008353	2.4962	47.4057	1.7279	TT	GG	AA	GG	TT	CC	GG	TT	AA	-2.4535
OSU	lax	2+12	Rht1	QAM412	OR2050910	CC	NN	GG	AA	AA	CC	AA	GG	TT	TT	NN	GG	CC	TT	TT	CC	GG	TT	CC	GG	CC	GG	NN	0.06205	-0.1599	-0.5068	0.02263	0.7008	0.934	-0.4897	NN	GG	AA	AA	CC	AA	GG	TT	GG	-2.2017
OSU	lax	2+12	Rht1	QAM413	OR2050913	CC	TC	GG	NN	GG	CC	AA	GG	TT	GG	TC	GG	NN	TT	TT	CC	NN	TT	CC	NN	CC	NN	TC	-0.0772	0.6843	1.0133	0.01067	-1.8371	-5.7209	0.2987	TC	GG	NN	GG	CC	AA	GG	TT	AA	0.426
OSU	lax	2+12	Rht1	QAM414	OR2050914	CC	NN	GG	AA	AA	CC	AA	GG	TT	TT	NN	GG	CC	TT	TT	CC	GG	TT	CC	GG	CC	GG	NN	0.0592	0.7603	-0.3516	0.01252	-0.6839	0.07144	-0.8389	NN	GG	AA	AA	CC	AA	GG	TT	GG	-1.3729
OSU	lax	2+12	Rht1	QAM415	OR2060323	CC	CC	GG	AA	AA	TT	AA	GG	CC	TT	CC	GG	CC	TT	CC	CC	GG	TT	TT	AA	CC	GG	CC	-0.2077	-1.8607	-0.1217	0.00972	2.1821	0.8433	1.1702	CC	GG	AA	AA	TT	AA	GG	CC	GG	-0.9725
OSU	lax	2+12	Rht1	QAM416	OR2060324	CC	CC	GG	AA	AA	TT	AA	GG	CC	TT	CC	GG	CC	TT	CC	CC	GG	TT	TT	AA	CC	GG	CC	-0.1653	-1.1882	0.4412	0.01063	1.7029	8.9182	1.9633	CC	GG	AA	AA	TT	AA	GG	CC	GG	-0.2783
OSU	lax	2+12	Rht1	QAM417	OR2060395	CC	CC	GG	AA	AA	CC	AA	GG	TT	TT	CC	GG	CC	TT	TT	CC	GG	TT	CC	AA	CC	GG	CC	0.0993	0.29	-0.6683	0.01357	-0.9215	-3.692	-2.0655	CC	GG	AA	AA	CC	AA	GG	TT	AA	-1.809
OSU	lax	2+12	Rht1	QAM418	OR2060431	CC	CC	GG	GG	GG	CC	CC	GG	TT	GG	CC	GG	CC	TT	CC	CC	AA	TT	CC	GG	CC	AA	CC	-0.2094	-2.3639	-1.1582	0.02591	1.7921	9.5745	1.1994	CC	GG	GG	GG	CC	CC	GG	TT	GG	-3.6441
OSU	lax	2+12	Rht1	QAM419	OR2060926	CC	CC	GG	AA	AA	TT	CC	GG	CC	TT	CC	GG	CC	TT	TT	CC	AA	TT	TT	GG	CC	AA	CC	-0.1341	-0.954	-1.1026	0.02982	1.5679	12.7831	1.8552	CC	GG	AA	AA	TT	CC	GG	CC	AA	-3.6745
OSU	lax	2+12	Rht1	QAM420	OR2070011	CC	CC	GG	AA	AA	CC	NN	GG	TT	TT	CC	GG	CC	TT	CC	CC	GG	CC	CC	NN	CC	GG	CC	0.03651	0.4708	-0.2607	-0.01646	-2.8247	-1.2252	-1.5043	CC	GG	AA	AA	CC	NN	GG	TT	AA	0.8272
OSU	lax	H	Rht1	QAM421	OR2070385	CC	CC	GG	GG	AA	TT	AA	GG	TT	GG	CC	GG	CC	TT	TT	CC	GG	TT	TT	AA	CC	GG	CC	-0.2154	-1.9795	0.6131	0.02588	2.7495	3.1937	1.3958	CC	GG	GG	AA	TT	AA	GG	TT	GG	-1.1145
OSU	lax	.	Rht1	QAM422	OR2070453	CC	CC	GG	AA	AA	CC	AA	GG	TT	GG	CC	GG	CC	TT	TC	CC	GG	TT	CC	GG	CC	GG	CC	-0.1993	-2.2445	-0.2168	-0.00303	0.4491	-4.8915	0.2008	CC	GG	AA	AA	CC	AA	GG	TT	GG	-0.1105
OSU	lax	2+12	Rht1	QAM423	OR2070608	CC	CC	GG	AA	AA	CC	AA	GG	TT	TT	CC	GG	CC	TT	CC	CC	AA	TT	CC	AA	CC	AA	CC	0.04231	1.3437	0.8941	-0.01152	-1.8438	0.6665	-0.1385	CC	GG	AA	AA	CC	AA	GG	TT	GG	1.8307
OSU	lax	2+12	Rht1	QAM424	OR2070870	CC	CC	GG	AA	GG	CC	CC	AA	CC	TT	CC	GG	TT	CC	TT	CC	GG	CC	CC	AA	TT	GG	CC	-0.04653	-0.4765	0.1884	-0.01673	-2.3741	15.5478	-1.4433	CC	GG	AA	GG	CC	CC	AA	CC	GG	1.6799
OSU	lax	5+10	Rht2	QAM425	OR2071029	CC	CC	GG	AA	AA	TT	AA	GG	TT	GG	CC	GG	CC	TT	CC	CC	GG	TT	TT	AA	CC	GG	CC	-0.05744	-1.7232	0.5302	0.0214	1.1552	18.862	0.09875	CC	GG	AA	AA	TT	AA	GG	TT	GG	-0.9379
OSU	lax	2+12	Rht2	QAM426	OR2071071	TT	TT	GG	AA	AA	TT	AA	GG	TT	GG	TT	GG	CC	TT	CC	CC	AA	TT	TT	AA	CC	AA	TT	-0.1687	0.8517	-0.3166	0.01738	3.3764	-4.5443	0.1423	TT	GG	AA	AA	TT	AA	GG	TT	GG	-1.8825
OSU	lax	2+12	Rht2	QAM427	OR2071073	CC	TT	GG	AA	GG	CC	AA	GG	TT	GG	TT	GG	TT	TT	CC	CC	GG	CC	CC	AA	CC	GG	TT	-0.2175	-1.0743	-0.986	0.009965	4.6989	-0.2453	1.2088	TT	GG	AA	GG	CC	AA	GG	TT	GG	-1.9837
OSU	lax	.	Rht1	QAM428	OR2071628	CC	CC	GG	NN	AA	CC	AA	GG	TT	TT	CC	GG	CC	TT	TC	CC	AA	NN	CC	AA	CC	AA	CC	-0.01035	1.6905	-0.1482	-0.00252	0.4425	8.1264	-1.502	CC	GG	NN	AA	CC	AA	GG	TT	GG	0.03568
OSU	lax	2+12	Rht1	QAM429	OR2071681	CC	CC	GG	AA	AA	TT	AA	GG	TT	GG	CC	GG	CC	TT	CC	CC	AA	TT	TT	AA	CC	AA	CC	-0.2441	-3.8	-1.1963	0.02297	4.4738	0.1351	2.5908	CC	GG	AA	AA	TT	AA	GG	TT	GG	-3.2042
OSU	lax	2+12	Rht1	QAM430	OR2080641	CC	CC	GG	AA	AA	CC	AA	GG	TT	GG	CC	GG	CC	TT	TT	CC	GG	TT	CC	GG	CC	GG	CC	-0.235	-1.1471	0.4299	0.02953	2.387	-9.7382	0.6226	CC	GG	AA	AA	CC	AA	GG	TT	GG	-1.6561
OSU	lax	2+12	.	QAM431	OR9900553	CC	CC	GG	AA	AA	CC	CC	GG	TT	TT	CC	GG	CC	TT	CC	CC	AA	TT	CC	GG	CC	AA	CC	-0.01243	1.7925	-0.05306	0.01872	1.0627	11.2036	-1.5917	CC	GG	AA	AA	CC	CC	GG	TT	GG	-1.3719
OSU	lax	2+12	Rht1	QAM432	OR9901619	CC	CC	GG	AA	AA	CC	AA	GG	TT	TT	CC	GG	CC	TT	TT	CC	GG	TT	CC	AA	CC	GG	CC	-0.0272	0.9154	0.5123	-0.0135	-2.1979	-9.1601	-1.1425	CC	GG	AA	AA	CC	AA	GG	TT	AA	1.5003
OSU	lax	2+12	Rht1	QAM433	ORCF101	CC	CC	GG	AA	GG	CC	AA	AA	TT	GG	CC	GG	CC	TT	CC	CC	GG	TT	CC	AA	CC	GG	CC	-0.1191	-2.5906	-0.6467	0.02318	0.2935	-6.0037	1.097	CC	GG	AA	GG	CC	AA	AA	TT	GG	-2.3744
OSU	lax	2+12	Rht1	QAM434	ORCF102	CC	CC	GG	NN	AA	CC	AA	GG	TT	TT	CC	GG	CC	TT	CC	CC	GG	TT	CC	AA	CC	GG	CC	-0.1826	-1.8923	-0.6446	0.01625	1.5643	-3.0979	0.7189	CC	GG	NN	AA	CC	AA	GG	TT	GG	-1.8048
OSU	lax	5+10	Rht1	QAM435	ORCF103	CC	TT	GG	AA	GG	CC	AA	GG	TT	GG	TT	AA	NN	CC	TT	AA	GG	TT	CC	GG	CC	GG	TT	0.00857	-2.721	-1.8094	0.01874	0.1397	3.824	-0.01605	TT	GG	AA	GG	CC	AA	GG	TT	AA	-3.5858
OSU	lax	2+12	Rht1	QAM436	ORF2267-03	CC	CC	GG	AA	AA	CC	CC	GG	TT	TT	CC	GG	TT	TT	CC	CC	GG	TT	CC	NN	CC	GG	CC	-0.04168	-0.4842	0.122	-0.0099	0.2408	9.5388	-0.1649	CC	GG	AA	AA	CC	CC	GG	TT	AA	0.9069
OSU	lax	2+12	Rht1	QAM437	ORH010083	CC	CC	AA	GG	GG	CC	CC	GG	TT	TT	CC	GG	TT	TT	TT	CC	GG	TT	CC	GG	CC	GG	CC	0.04414	-1.1874	-0.4456	-0.01078	-1.121	13.0137	-0.717	CC	AA	GG	GG	CC	CC	GG	TT	AA	0.135
OSU	lax	2+12	Rht1	QAM438	ORH010837	CC	NN	GG	GG	AA	CC	AA	GG	TT	TT	NN	GG	CC	CC	TT	CC	AA	TT	CC	GG	CC	AA	NN	-0.2328	-4.0289	-1.4421	-0.00641	1.2698	-6.7165	2.2018	NN	GG	GG	AA	CC	AA	GG	TT	GG	-1.3977
OSU	lax	2+12	Rht1	QAM439	ORH010918	TT	TT	GG	GG	AA	CC	AA	GG	TT	TT	TT	GG	TT	TT	TT	CC	AA	TT	CC	AA	CC	AA	TT	-0.1634	-2.0758	-0.8115	0.02649	1.5316	-0.2001	2.0667	TT	GG	GG	AA	CC	AA	GG	TT	GG	-2.969
OSU	lax	2+12	Rht1	QAM440	ORI2060306	CC	CC	GG	GG	GG	CC	AA	AA	TT	GG	CC	GG	CC	TT	CC	CC	GG	TT	CC	AA	CC	GG	CC	-0.0861	-1.8435	0.6401	0.000972	-3.1731	-0.1532	-1.4064	CC	GG	GG	GG	CC	AA	AA	TT	GG	0.6663
OSU	lax	2+12	Rht1	QAM441	ORI2101835	CC	CC	GG	GG	AA	NN	AA	GG	TT	TT	CC	GG	CC	TT	CC	CC	GG	TT	NN	AA	CC	GG	CC	-0.1132	-2.8079	-1.4327	-0.01579	1.7616	2.3997	0.5001	CC	GG	GG	AA	NN	AA	GG	TT	GG	-0.7412
OSU	lax	H	Rht1	QAM442	ORI2101839	CC	TC	GG	AA	GG	TT	AA	GG	TT	NN	TC	GG	CC	TT	TC	CC	GG	TT	TT	AA	CC	GG	TC	-0.1603	-2.8737	-0.8352	-0.01096	3.5898	-3.5526	1.6892	TC	GG	AA	GG	TT	AA	GG	TT	GG	-0.1299
OSU	lax	2+12	Rht1	QAM443	ORSS1757	CC	CC	GG	AA	AA	CC	AA	GG	TT	TT	CC	GG	CC	TT	TT	CC	GG	TT	CC	AA	CC	GG	CC	0.06675	1.4096	-0.4303	-0.00392	1.0066	-11.8539	-1.4533	CC	GG	AA	AA	CC	AA	GG	TT	GG	-0.3456
OSU	lax	2+12	Rht2	QAM444	SALUTE	CC	TT	AA	AA	AA	NN	CC	GG	TT	TT	TT	GG	TT	TT	TT	CC	GG	TT	NN	GG	CC	GG	TT	0.08418	-0.731	-0.1599	-0.00699	0.5099	-1.4498	-0.1752	TT	AA	AA	AA	NN	CC	GG	TT	GG	0.1994
U of I	lax	2+12	Rht1	QAM445	SIMON	CC	CC	GG	AA	AA	CC	CC	GG	TT	TT	CC	GG	CC	TT	CC	CC	GG	TT	CC	AA	CC	GG	CC	-0.1083	-0.07199	0.3378	0.02215	0.3613	0.343	0.5562	CC	GG	AA	AA	CC	CC	GG	TT	AA	-1.0899
OSU	lax	2+12	Rht1	QAM446	SKILES	CC	CC	AA	GG	GG	CC	CC	GG	TT	TT	CC	GG	TT	TT	TT	CC	GG	TT	CC	GG	CC	GG	CC	0.03471	-0.9846	-0.5837	0.00034	0.05144	6.7765	-0.577	CC	AA	GG	GG	CC	CC	GG	TT	AA	-0.826
OSU	lax	2+12	Rht1	QAM447	STEPHENS	CC	TT	GG	AA	AA	CC	CC	GG	TT	TT	TT	GG	CC	TT	TT	CC	GG	TT	CC	GG	CC	GG	TT	-0.07094	-1.921	0.28	0.002979	-0.09606	-4.2841	0.2696	TT	GG	AA	AA	CC	CC	GG	TT	GG	0.1393
OSU	lax	2+12	Rht1	QAM448	TUBBS	CC	CC	GG	AA	AA	TT	AA	GG	TT	GG	CC	GG	CC	TT	CC	CC	GG	TT	TT	AA	CC	GG	CC	-0.2596	-2.1992	0.09871	0.0139	3.7262	-4.9969	2.288	CC	GG	AA	AA	TT	AA	GG	TT	GG	-0.8491
WSU	lax	2+12	Rht1	QAM449	WA7918	CC	TT	AA	GG	GG	CC	CC	GG	TT	TT	TT	GG	TT	TT	CC	CC	GG	TT	CC	GG	CC	GG	TT	-0.1329	-0.5465	-0.6583	0.02051	2.467	19.9826	0.4375	TT	AA	GG	GG	CC	CC	GG	TT	GG	-2.297
WSU	lax	2+12	Rht1	QAM450	WA7932	CC	TT	AA	GG	GG	CC	CC	GG	TT	TT	TT	GG	TT	TT	CC	CC	GG	TT	CC	GG	CC	GG	TT	-0.08021	-0.9537	-1.1892	0.02004	2.8463	23.2408	0.7542	TT	AA	GG	GG	CC	CC	GG	TT	GG	-2.9329
WSU	lax	2+12	Rht1	QAM451	WA7933	CC	CC	GG	AA	GG	CC	AA	GG	TT	TT	CC	GG	TT	TT	CC	CC	AA	TT	CC	GG	CC	AA	CC	-0.01702	-1.9116	-0.9159	-0.01224	-0.7743	5.6828	-0.6778	CC	GG	AA	GG	CC	AA	GG	TT	AA	-0.3071
WSU	lax	H	Rht1	QAM452	WA7934	CC	TC	GG	AA	GG	TT	NN	GG	TT	TT	TC	GG	TT	TT	TC	AA	GG	TT	TT	GG	CC	GG	TC	-0.09321	-1.5326	-2.253	-0.01591	2.2345	41.9754	0.9889	TC	GG	AA	GG	TT	NN	GG	TT	AA	-1.8046
WSU	lax	5+10	Rht1	QAM453	WA7935	CC	CC	GG	AA	GG	NN	CC	GG	TT	TT	CC	AA	TT	TT	TT	AA	GG	NN	NN	GG	CC	GG	CC	-0.05646	-0.6016	-1.6283	-0.01878	1.5003	4.5062	0.5855	CC	GG	AA	GG	NN	CC	GG	TT	AA	-0.8329
WSU	lax	5+10	Rht1	QAM454	WA7935C	CC	CC	GG	AA	GG	TT	CC	GG	TT	TT	CC	AA	TT	TT	TT	AA	GG	TT	TT	GG	CC	GG	CC	-0.02274	-1.5932	-2.254	-0.00846	-0.6137	39.0792	0.201	CC	GG	AA	GG	TT	CC	GG	TT	AA	-2.2654
WSU	lax	2+12	Rht1	QAM455	WA7965	CC	CC	GG	AA	GG	CC	AA	GG	TT	TT	CC	GG	CC	TT	CC	CC	GG	TT	CC	GG	CC	GG	CC	-0.09887	-2.1652	-0.8526	6.8e-05	0.08207	11.7466	1.5856	CC	GG	AA	GG	CC	AA	GG	TT	AA	-1.0803
WSU	lax	2+12	Rht1	QAM456	WA7970	CC	CC	GG	AA	GG	CC	AA	GG	TT	TT	CC	GG	TT	TT	CC	CC	GG	TT	CC	GG	CC	GG	CC	0.02369	-1.2286	-0.5098	0.007598	-0.2963	8.5789	0.1575	CC	GG	AA	GG	CC	AA	GG	TT	AA	-1.1654
WSU	lax	2+12	Rht2	QAM457	WA7971	CC	CC	AA	AA	AA	TT	CC	GG	TT	TT	CC	GG	TT	TT	TT	CC	GG	TT	TT	AA	CC	GG	CC	-0.0192	-0.2722	-0.8131	0.0039	4.4078	8.4884	0.9835	CC	AA	AA	AA	TT	CC	GG	TT	GG	-1.3087
USDA-ARS	club	2+12	Rht2	QAM458	2004X151-5-0-4	CC	CC	GG	GG	GG	CC	AA	AA	TT	TT	CC	GG	TT	CC	TT	CC	GG	CC	CC	AA	CC	GG	CC	-0.03704	0.4929	0.1834	-0.00682	-0.4964	-12.1468	0.3185	CC	GG	GG	GG	CC	AA	AA	TT	AA	0.7533
WSU	lax	2+12	Rht1	QAM459	WA8000	CC	TC	GG	AA	AA	CC	AA	GG	TT	TT	TC	GG	CC	TT	CC	CC	GG	TT	CC	AA	CC	GG	TC	-0.02311	0.5115	0.6518	0.008636	0.6532	9.846	-0.274	TC	GG	AA	AA	CC	AA	GG	TT	AA	0.1991
WSU	lax	2+12	Rht1	QAM460	WA8020	CC	CC	GG	GG	GG	CC	AA	GG	TT	TT	CC	GG	TT	TT	CC	CC	GG	TT	CC	AA	CC	GG	CC	-0.07515	-0.2301	-1.4361	0.03953	2.439	14.9143	0.765	CC	GG	GG	GG	CC	AA	GG	TT	GG	-4.5448
WSU	lax	2+12	Rht1	QAM461	WA8021	CC	CC	GG	AA	AA	CC	AA	GG	TT	TT	CC	GG	CC	TT	CC	CC	GG	TT	CC	NN	CC	GG	CC	-0.02109	-0.6398	0.2598	0.006096	-0.1564	4.0537	-0.1302	CC	GG	AA	AA	CC	AA	GG	TT	AA	-0.1285
WSU	lax	2+12	Rht1	QAM462	WA8063	CC	TT	GG	GG	GG	TT	CC	GG	TT	TT	TT	GG	TT	TT	CC	CC	GG	TT	TT	GG	CC	GG	TT	-0.1583	-3.5317	-3.0308	0.02732	5.0132	8.9852	1.0513	TT	GG	GG	GG	TT	CC	GG	TT	GG	-5.715
WSU	lax	2+12	Rht1	QAM463	WA8064	CC	TT	GG	GG	GG	TT	NN	GG	TT	TT	TT	GG	TT	TT	CC	CC	GG	TT	TT	GG	CC	GG	TT	-0.125	-3.0637	-1.8861	0.01635	2.6528	6.4973	2.1038	TT	GG	GG	GG	TT	NN	GG	TT	GG	-3.5495
WSU	lax	2+12	Rht1	QAM464	WA8065	CC	TT	GG	GG	GG	TT	CC	GG	TT	TT	TT	GG	TT	TT	CC	CC	GG	CC	TT	AA	CC	GG	TT	-0.2861	-6.2617	-2.1983	-0.01141	7.1693	16.9959	2.3739	TT	GG	GG	GG	TT	CC	GG	TT	GG	-1.7291
WSU	lax	2+12	Rht1	QAM465	WA8066	CC	CC	AA	GG	AA	CC	CC	AA	CC	TT	CC	GG	CC	TT	TT	CC	GG	CC	CC	GG	CC	GG	CC	-0.02499	1.7178	0.3335	0.04246	1.0986	2.9501	-0.1792	CC	AA	GG	AA	CC	CC	AA	CC	AA	-2.4761
WSU	lax	5+10	Rht1	QAM466	WA8092	CC	CC	GG	AA	GG	TT	CC	GG	TT	TT	CC	GG	TT	TT	NN	AA	GG	TT	TT	GG	CC	GG	CC	-0.04653	-0.127	-0.4007	-0.01673	-1.4939	37.9027	-0.445	CC	GG	AA	GG	TT	CC	GG	TT	AA	0.9752
WSU	lax	2+12	Rht1	QAM467	WA8093	CC	TT	GG	GG	GG	CC	AA	GG	TT	TT	TT	GG	TT	TT	CC	CC	GG	TT	CC	GG	CC	GG	TT	0.0565	-0.3509	-0.7549	-0.00688	-1.3884	4.7448	-0.942	TT	GG	GG	GG	CC	AA	GG	TT	GG	-0.5093
WSU	lax	H	Rht1	QAM468	WA8094	CC	CC	AA	GG	GG	TT	CC	GG	NN	TT	CC	AA	TT	TT	TT	NN	GG	NN	TT	GG	CC	GG	CC	0.06466	0.3537	-0.5628	-0.00081	1.1707	8.1866	0.1346	CC	AA	GG	GG	TT	CC	GG	NN	AA	-0.6473
WSU	lax	2+12	Rht1	QAM469	WA8114	CC	TT	GG	GG	GG	CC	AA	GG	TT	TT	TT	GG	TT	TT	CC	CC	GG	TT	CC	GG	CC	GG	TT	0.04493	-1.1084	-0.6431	-0.00288	-0.528	5.0726	-0.5508	TT	GG	GG	GG	CC	AA	GG	TT	GG	-0.5899
WSU	lax	2+12	Rht1	QAM470	WA8115	CC	TT	AA	GG	GG	TT	AA	GG	TT	TT	TT	GG	TT	TT	CC	CC	GG	TT	TT	GG	CC	GG	TT	-0.03628	-1.4898	-1.1626	-0.00685	-0.3003	4.5448	-0.351	TT	AA	GG	GG	TT	AA	GG	TT	GG	-0.9835
WSU	lax	2+12	Rht1	QAM471	WA8116	CC	CC	GG	AA	GG	TT	CC	GG	CC	TT	CC	AA	NN	TT	TT	CC	GG	TT	TT	GG	CC	GG	CC	0.04504	-1.7455	-1.9884	-0.00029	3.1966	2.2275	1.3474	CC	GG	AA	GG	TT	CC	GG	CC	AA	-2.4932
WSU	lax	2+12	Rht1	QAM472	WA8117	CC	CC	GG	AA	GG	TT	CC	GG	CC	TT	CC	AA	TT	TT	TT	CC	GG	NN	TT	GG	CC	GG	CC	-0.00257	-1.3102	-1.813	0.01078	4.2096	5.5232	2.062	CC	GG	AA	GG	TT	CC	GG	CC	AA	-3.0214
WSU	lax	2+12	Rht1	QAM473	WA8134	CC	CC	GG	AA	GG	TT	AA	GG	TT	TT	CC	GG	TT	TT	CC	CC	AA	TT	TT	GG	CC	AA	CC	0.07297	-0.3211	0.008122	0.003023	-1.3277	1.1443	0.1631	CC	GG	AA	GG	TT	AA	GG	TT	AA	-0.1665
WSU	lax	2+12	.	QAM475	WA8136	CC	CC	AA	AA	AA	CC	NN	AA	CC	TT	CC	GG	CC	TT	TT	CC	GG	CC	CC	GG	CC	GG	CC	0.1179	1.998	1.1849	0.02766	-1.4515	-8.6044	-1.0315	CC	AA	AA	AA	CC	NN	AA	CC	AA	-0.4658
WSU	lax	2+12	Rht1	QAM476	WA8142	CC	TC	GG	GG	AA	CC	AA	GG	TT	TT	TC	GG	CC	TT	CC	CC	GG	TT	CC	AA	CC	GG	TC	-0.09707	-4.1793	-0.4984	-0.00187	-0.5544	5.274	-0.1777	TC	GG	GG	AA	CC	AA	GG	TT	AA	-0.4429
WSU	lax	5+10	Rht1	QAM477	WA8143	CC	CC	GG	AA	GG	TT	CC	GG	TT	TT	CC	AA	TT	TT	TT	AA	GG	TT	TT	GG	CC	GG	CC	-0.01338	-1.8724	-1.1388	-0.00921	2.0374	31.9293	0.7944	CC	GG	AA	GG	TT	CC	GG	TT	AA	-0.6094
WSU	lax	5+10	Rht1	QAM478	WA8144	CC	CC	GG	AA	GG	TT	CC	GG	TT	TT	CC	AA	TT	TT	TT	AA	GG	TT	TT	GG	CC	GG	CC	-0.02335	-1.5213	-1.5446	-0.00893	1.1173	44.8716	-0.3526	CC	GG	AA	GG	TT	CC	GG	TT	AA	-1.161
WSU	lax	2+12	Rht1	QAM479	XERPHA	CC	CC	AA	AA	GG	TT	CC	GG	TT	TT	CC	GG	TT	TT	TT	CC	GG	TT	TT	AA	CC	GG	CC	-0.1441	-2.1629	-1.027	-0.00388	3.1591	-2.2414	2.5434	CC	AA	AA	GG	TT	CC	GG	TT	GG	-1.1094
Westbred	lax	2+12	Rht1	QAM480	MOHLER	CC	TC	GG	AA	AA	CC	CC	GG	TT	TT	TC	GG	CC	TT	TT	CC	GG	TT	CC	AA	CC	GG	TC	-0.1187	-0.3222	-0.0673	0.01288	1.3581	0.343	1.1086	TC	GG	AA	AA	CC	CC	GG	TT	AA	-1.0045
SKHRD - kernel hardness, BKFYELD - break flour yield, FYELD - total flour yield, MSCOR - milling score, FASH - flour ash, FSRC - carbonate solvent retention capacity, FSRL - lactic acid solvent retention capacity, FSRW - water solvent retention capacity, CODI - cookie diameter
a SNP ID, name, chromosome and position are based on the wheat consensus map by Wang et al. 2014.
b Favorable alleles for each trait. For SKWT, SKSIZE, TWT, all baking parameters and milling traits, alleles that increase trait values are preferred. Alleles that contribute to lower values are favored for SKHRD, WPROT and all four parameters except FSRL, FSDS and FSV. Depending on the end-use products either alleles (positive or negative) is preferred for FSRL, FSDS and FSV.
c Alleles of each SNP. Underlined nucleotides represent minor alleles.
